# Supplementary material for: Restriction of reaction sites on metal-sulfide cores induced by steric repulsion of bis-N-heterocyclic carbene ligands in trinuclear complexes bearing triply bridging sulfide ligands
Source: Royal Society of Chemistry journal article supplement (doi:10.1039/d4ra01671h), 2024-01-01
Supplement: d4ra01671h1.pdf [file d4ra01671h1.pdf]

**Restriction of reaction sites on metal-sulfide cores induced by steric repulsion of bis-N-heterocyclic carbene ligands in trinuclear complexes bearing triply bridging sulfide ligands.**

Natsuki Yabune, Hiroshi Nakajima and Takanori Nishioka\*

*Division of Molecular Materials Science, Graduate School of Science, Osaka City University, Osaka 558-8585, Japan.*

*Department of Chemistry, Graduate School of Science, Osaka Metropolitan University, Osaka 558-8585, Japan. E-mail: nishioka@omu.ac.jp.*

**Supplementary Information**

1.  $^1\text{H}$  NMR spectra of the complexes at 253 K and at 293 K.
2.  $^1\text{H}$  NMR spectra of the reaction mixtures of the complexes with Ag(I) ions.
3.  $^{195}\text{Pt}$  NMR spectroscopy
4. X-ray crystallography
5. DFT calculations
6.  $^1\text{H}$  and  $^{13}\text{C}$  NMR data for the newly synthesised complexes.
7. Electrospray ionisation mass spectrometry
8. Reference

## 1. $^1\text{H}$ NMR spectra of the complexes at 253 K and at 293 K

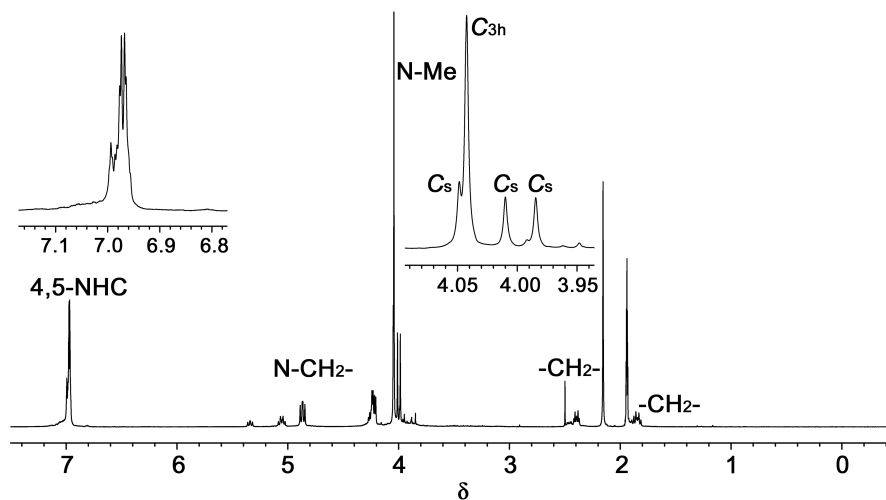

**Fig. S1**  $^1\text{H}$  NMR spectrum of triplatinum complex with bisNHC-C3 ligands,  $[\text{Pt}^{\text{C}_3}_3]^{2+}$ , at 293 K (600 MHz,  $\text{CD}_3\text{CN}$ ). Three and one sets of signals attributed to bisNHC ligands of the unsymmetric  $\text{C}_s$ - and symmetric  $\text{C}_{3h}$ -isomers were observed, especially the signals in the N-Me region were clearly separated.

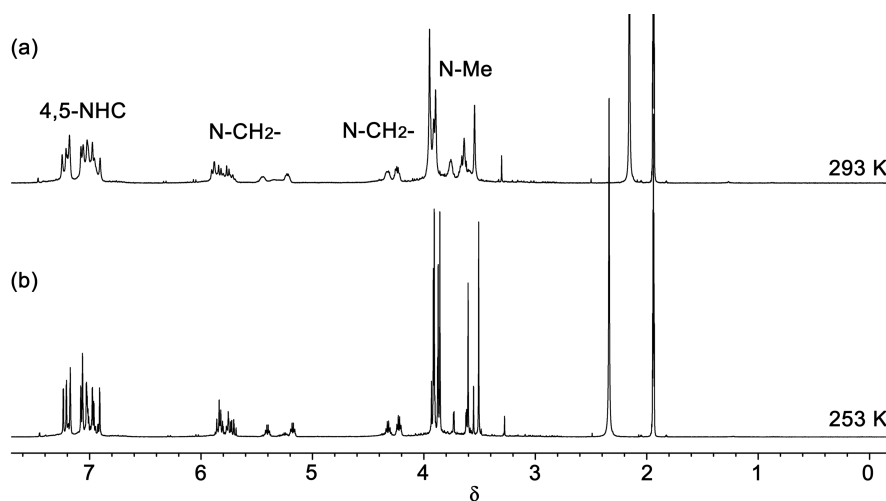

**Fig. S2**  $^1\text{H}$  NMR spectra of mixed-ligand triplatinum complex with two bisNHC-C1 and one bisNHC-C2 ligands,  $[\text{Pt}^{\text{C}_1}_2\text{Pt}^{\text{C}_2}]^{2+}$ , (a) at 293 K and (b) at 253 K (600 MHz,  $\text{CD}_3\text{CN}$ ). Several sets of sharp signals of the bisNHC ligands were observed at 253 K showing the existence of isomers in solution. The signals at 253 K become broad at 293 K due to the flapping motion of the bisNHC ligands.

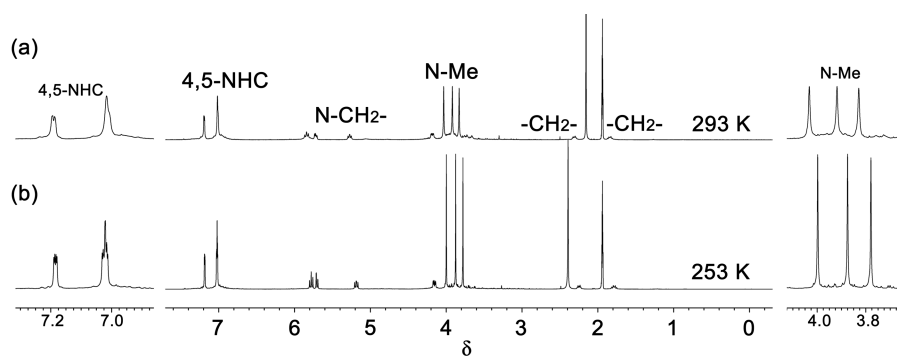

**Fig. S3**  $^1\text{H}$  NMR spectra of mixed-ligand triplatinum complex with two bisNHC-C1 and one bisNHC-C3 ligands,  $[\text{Pt}^{\text{C1}}_2\text{Pt}^{\text{C3}}]^{2+}$ , (a) at 293 K and (b) at 253 K (600 MHz,  $\text{CD}_3\text{CN}$ ). Three sets of signals for the bisNHC ligands were observed both at 253 K and 293 K. The three signals for the N-Me protons of three bisNHC ligands in  $[\text{Pt}^{\text{C1}}_2\text{Pt}^{\text{C3}}]^{2+}$  observed at 253 K clearly show the existence of one of the isomers. Three slightly broad signals observed at 293 K suggests the flapping motion and the equilibrium shifts to one of the isomers.

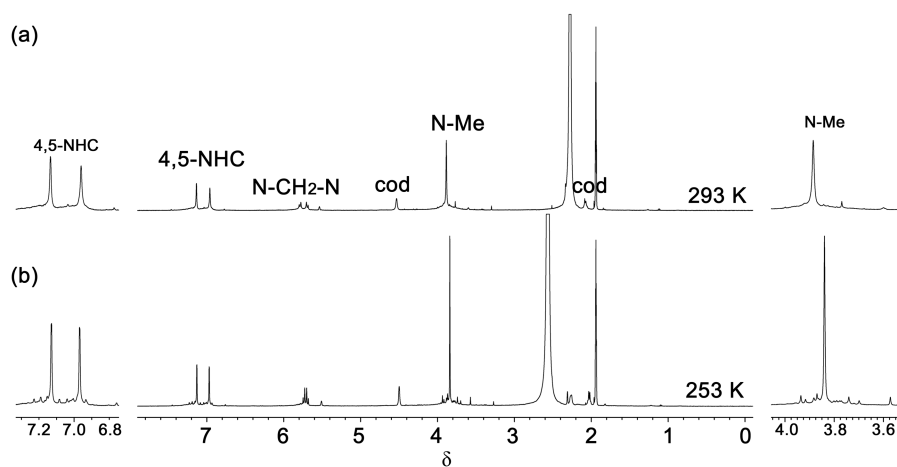

**Fig. S4**  $^1\text{H}$  NMR spectra of mixed-metal complex with two  $\{\text{Pt}(\text{bisNHC-C1})\}$  and one  $\{\text{Rh}(\text{cod})\}$  moieties,  $[\text{Pt}^{\text{C1}}_2\text{Rh}^{\text{cod}}]^{+}$ , (a) at 293 K and (b) at 253 K (600 MHz,  $\text{CD}_3\text{CN}$ ). One set of signals of the bisNHC ligands was observed at 253 K showing the existence of one of the isomers. One set of slightly broad signals appeared at 295 K, suggesting the dynamic behaviour due to the flapping motion of the bisNHC ligands and the equilibrium among the isomers shifted to one of them.

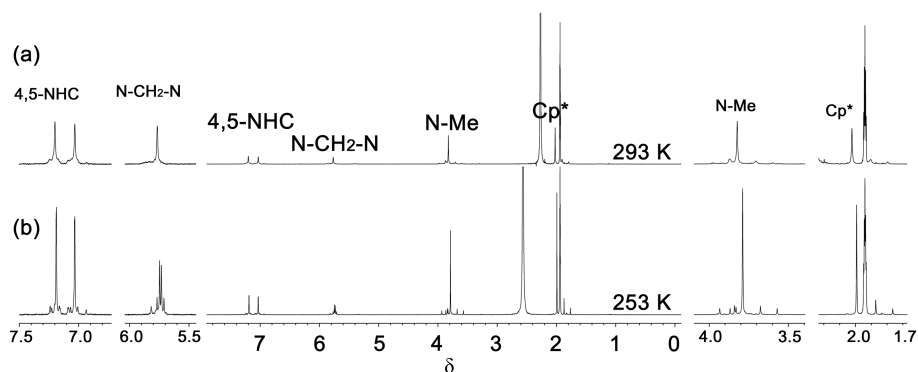

**Fig. S5**  $^1\text{H}$  NMR spectra of mixed-metal complex with two  $\{\text{Pt}(\text{bisNHC-C1})\}$  and one  $\{\text{RhCp}^*\}$  moieties,  $[\text{Pt}^{\text{C1}}_2\text{Rh}^{\text{Cp}^*}]^{2+}$ , (a) at 293 K and (b) at 253 K (600 MHz,  $\text{CD}_3\text{CN}$ ). One set of signals of the bisNHC ligands was observed at 253 K showing the existence of one of the isomers. One set of slightly broad signals appeared at 295 K, suggesting the dynamic behaviour due to the flapping motion of the bisNHC ligands and the equilibrium among the isomers shifted to one of them.

## 2. $^1\text{H}$ NMR spectra of the reaction mixtures of the complexes with $\text{Ag(I)}$ ions

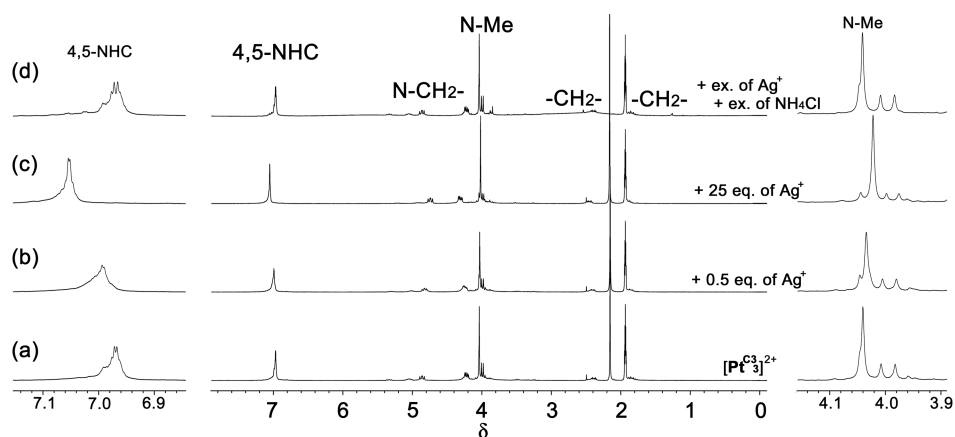

**Fig. S6**  $^1\text{H}$  NMR spectra of (a) triplatinum complex bearing bisNHC-C3 ligands,  $[\text{Pt}^{\text{C3}}_3]^{2+}$ , and its reaction mixtures with (b) 0.5 eq. and (c) 25 eq. of  $\text{Ag}^+$ , and (d) (c)+ex. of  $\text{NH}_4\text{Cl}$  (400 MHz,  $\text{CD}_3\text{CN}$ ). Slightly broad signals were observed for  $[\text{Pt}^{\text{C3}}_3]^{2+}$  and the highest signal observed in the N-Me region is attributed to the symmetric isomer beside the other three are assigned to the unsymmetric one in (a). With the addition of  $\text{Ag(I)}$  ions, the highest peak in the N-Me region moves toward the higher magnetic field in (b) and (c) and the intensities of the three small signals for the Cs isomer decrease. The signals in (d) after the addition of chloride ions to extract the  $\text{Ag(I)}$  ion are the same as those of the complex in (a).

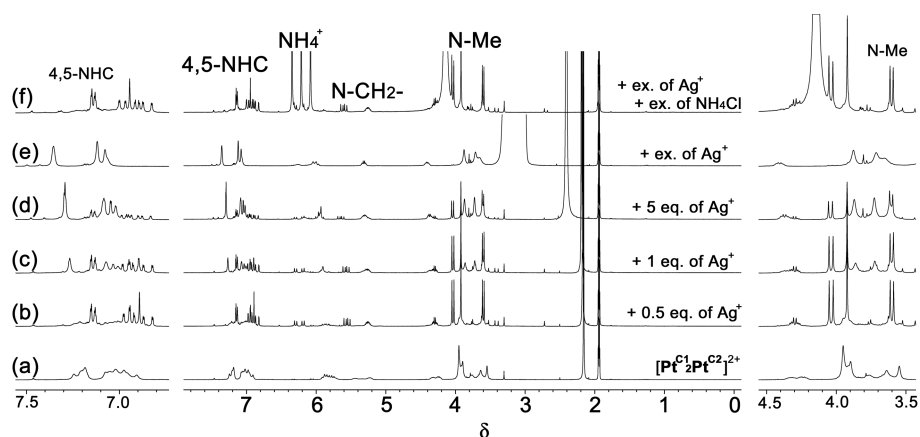

**Fig. S7**  $^1\text{H}$  NMR spectra of (a) triplatinum complex bearing two bisNHC-C1 and one bisNHC-C2 ligands,  $[\text{Pt}^{\text{C1}}\text{Pt}^{\text{C2}}]^{2+}$ , and its reaction mixtures with (b) 0.5 eq., (c) 1 eq., (d) 5 eq., (e) ex. of Ag(I) ions, and (f) (e)+ex. of  $\text{NH}_4\text{Cl}$  (400 MHz,  $\text{CD}_3\text{CN}$ ). Broad signals appeared in (a) showing the dynamic behaviour due to the flapping motion of the bisNHC ligands. The signals become sharp after the addition of 0.5 eq. of Ag(I) ions (b). After the further addition of Ag(I) ions, the intensities of the sharp signals decrease, and other broad signals appear in (b)–(d). Only broad signals are observed in (e) after the addition of excess Ag(I) ions. The same spectrum (f) as (b) is obtained after the addition of chloride ions to extract Ag(I) ions.

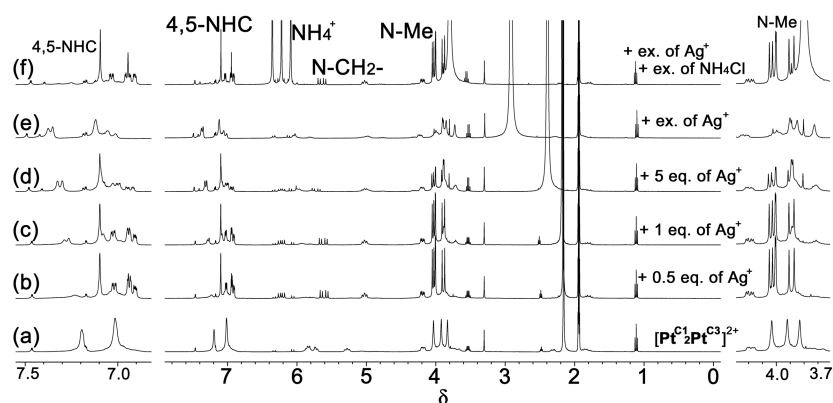

**Fig. S8**  $^1\text{H}$  NMR spectra of (a) triplatinum complex bearing two bisNHC-C1 and one bisNHC-C3 ligands,  $[\text{Pt}^{\text{C1}}\text{Pt}^{\text{C3}}]^{2+}$ , and its reaction mixtures with (b) 0.5 eq., (c) 1 eq., (d) 5 eq., (e) ex. of Ag(I) ions, and (f) (e)+ex. of  $\text{NH}_4\text{Cl}$  (400 MHz,  $\text{CD}_3\text{CN}$ ). Three sets of broad signals appeared in (a) showing the dynamic behaviour due to the flapping motion of the bisNHC ligands and the equilibrium shifts to one of the isomers. The signals become sharp after the addition of 0.5 eq. of Ag(I) ions (b). After the further addition of Ag(I) ions, the intensities of the sharp signals decrease, and other broad signals appear in (b)–(d). Only broad signals are observed in (e) after the addition of excess Ag(I) ions. The addition of chloride ions (f) affords the same spectrum as (b).

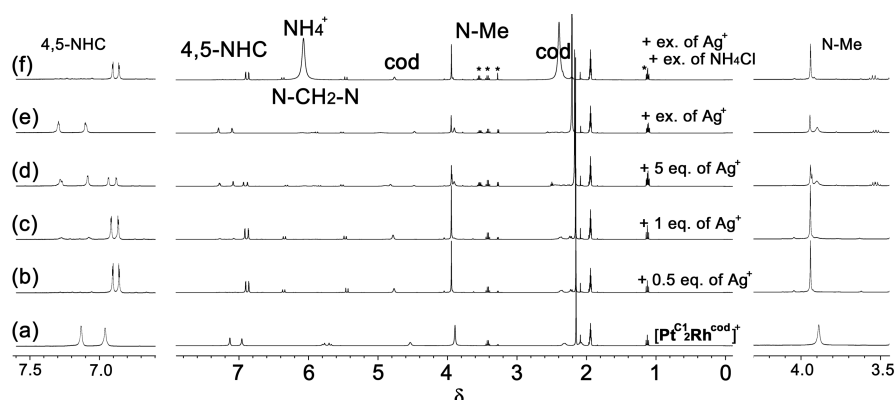

**Fig. S9**  $^1\text{H}$  NMR spectra of (a) trinuclear complex bearing two  $\{\text{Pt}(\text{bisNHC-C1})\}$  and one  $\{\text{Rh}(\text{cod})\}$  moieties,  $[\text{Pt}^{\text{C1}}_2\text{Rh}^{\text{cod}}]^+$ , and its reaction mixtures with (b) 0.5 eq., (c) 1 eq., (d) 5 eq., (e) ex. of  $\text{Ag}^+$ , and (f) (e)+ex. of  $\text{NH}_4\text{Cl}$  (400 MHz,  $\text{CD}_3\text{CN}$ ). \*Solvents (MeOH, EtOH,  $\text{Et}_2\text{O}$ ). One set of the broad signals, which are assigned to the bisNHC ligands one of the isomers, appears in (a). The addition of 0.5 eq. of  $\text{Ag}(\text{I})$  ions affords one set of the sharp signals in (b) suggesting the formation of the heptanuclear complex. The intensities of the signals decrease after the further addition of  $\text{Ag}(\text{I})$  ions and another set of signals appears in (c) and (d). In the presence of excess  $\text{Ag}(\text{I})$  ions, the signals for the heptanuclear complex disappear (e) and only the appeared signals are observed. After the addition of chloride ions, the same signals for the heptanuclear complex (f) as those in (a) are obtained.

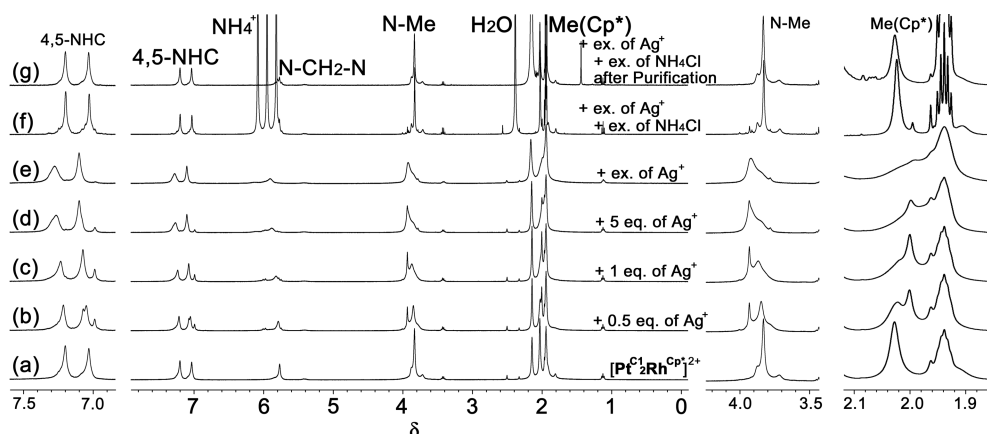

**Fig. S10**  $^1\text{H}$  NMR spectra of (a) trinuclear complex bearing two  $\{\text{Pt}(\text{bisNHC-C1})\}$  and one  $\{\text{RhCp}\}$  moieties,  $[\text{Pt}^{\text{C1}}_2\text{Rh}^{\text{Cp}^*}]^{2+}$ , and its reaction mixtures with (b) 0.5 eq., (c) 1 eq., (d) 5 eq., (e) ex. of  $\text{Ag}^+$ , (f) (e)+ex. of  $\text{NH}_4\text{Cl}$  and (g) (e) after purification to remove  $\text{NH}_4^+$  (400 MHz,  $\text{CD}_3\text{CN}$ ). After the addition of  $\text{Ag}(\text{I})$  ions, one set of signals other than those for  $[\text{Pt}^{\text{C1}}_2\text{Rh}^{\text{Cp}^*}]^{2+}$  appears in (b) and their intensities increase in (c) and (d). Only the increased signals are observed in the presence of excess  $\text{Ag}(\text{I})$  ions. The signals for  $[\text{Pt}^{\text{C1}}_2\text{Rh}^{\text{Cp}^*}]^{2+}$  are retrieved by the addition of chloride ions to extract  $\text{Ag}(\text{I})$  ions from the reaction system in (f) and (g).

### 3. $^{195}\text{Pt}$ NMR spectroscopy

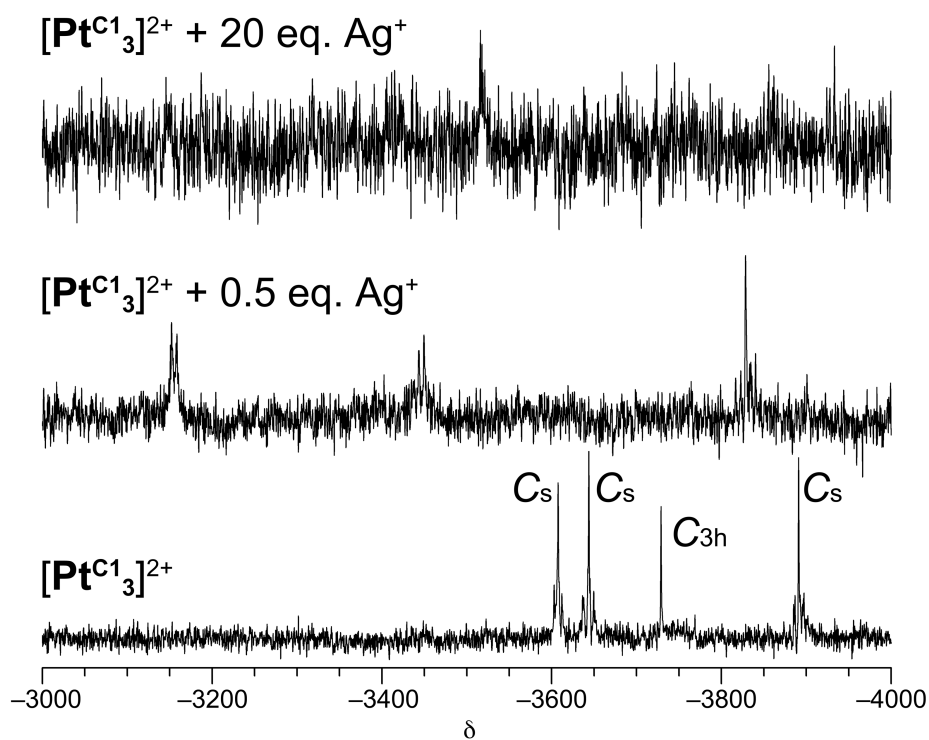

**Fig. S11**  $^{195}\text{Pt}$  NMR spectra for reactions of  $[\text{Pt}^{\text{C}1_3}]^{2+}$  and Ag(I) salt in  $\text{CD}_3\text{CN}$ .

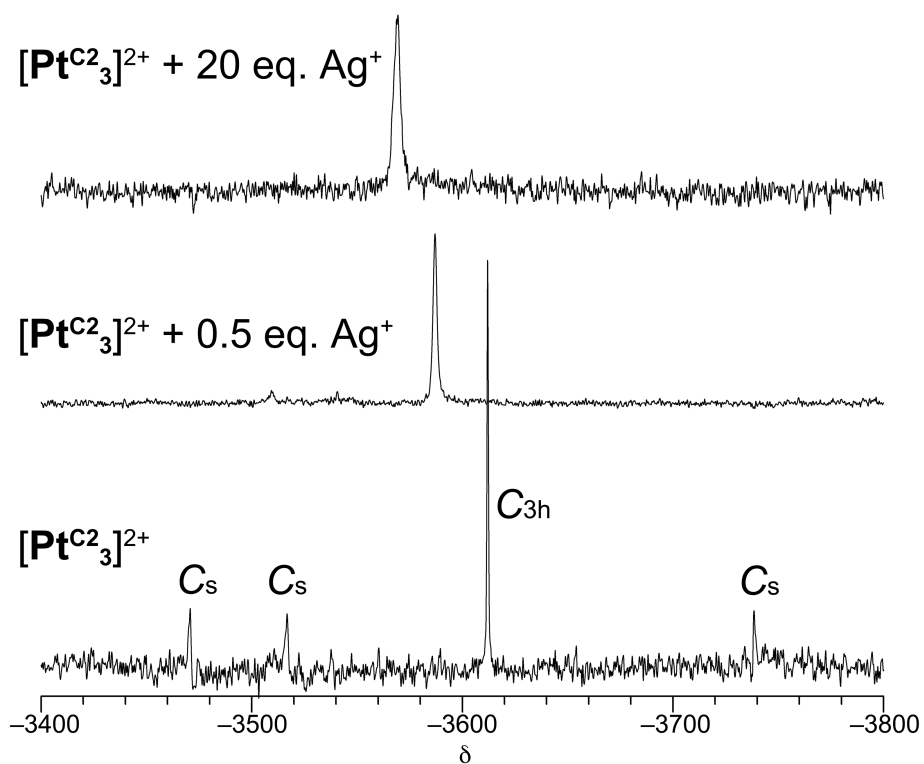

**Fig. S12**  $^{195}\text{Pt}$  NMR spectra for reactions of  $[\text{Pt}^{\text{C}2_3}]^{2+}$  and Ag(I) salt in  $\text{CD}_3\text{CN}$ .

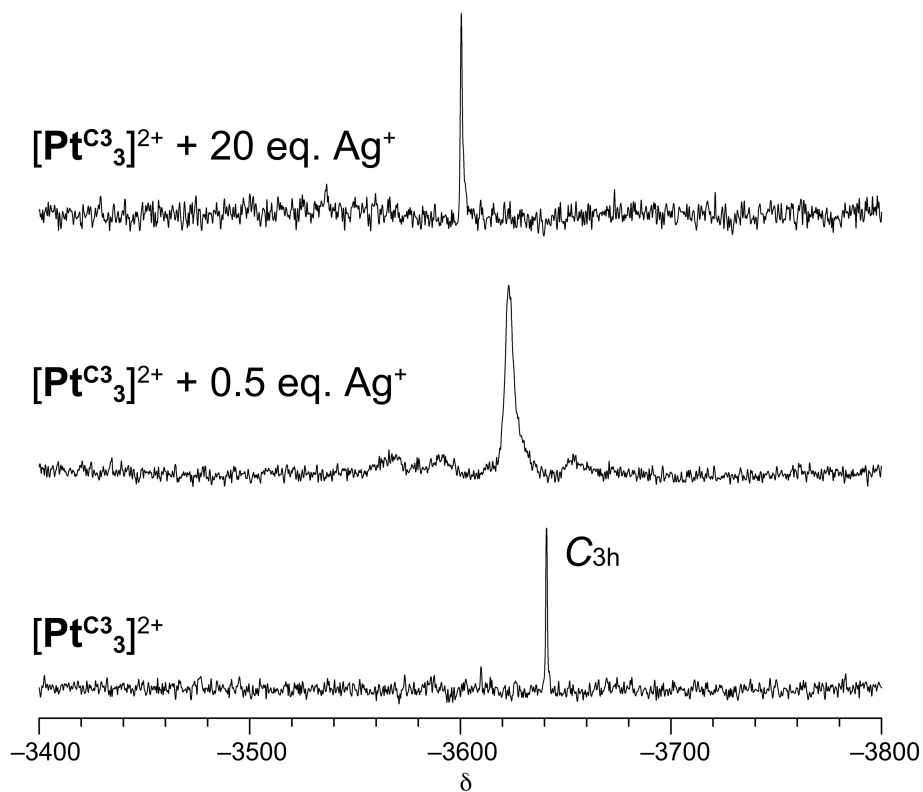

Fig. S13  $^{195}\text{Pt}$  NMR spectra for reactions of  $[\text{Pt}^{\text{C}3}_3]^{2+}$  and Ag(I) salt in  $\text{CD}_3\text{CN}$ .

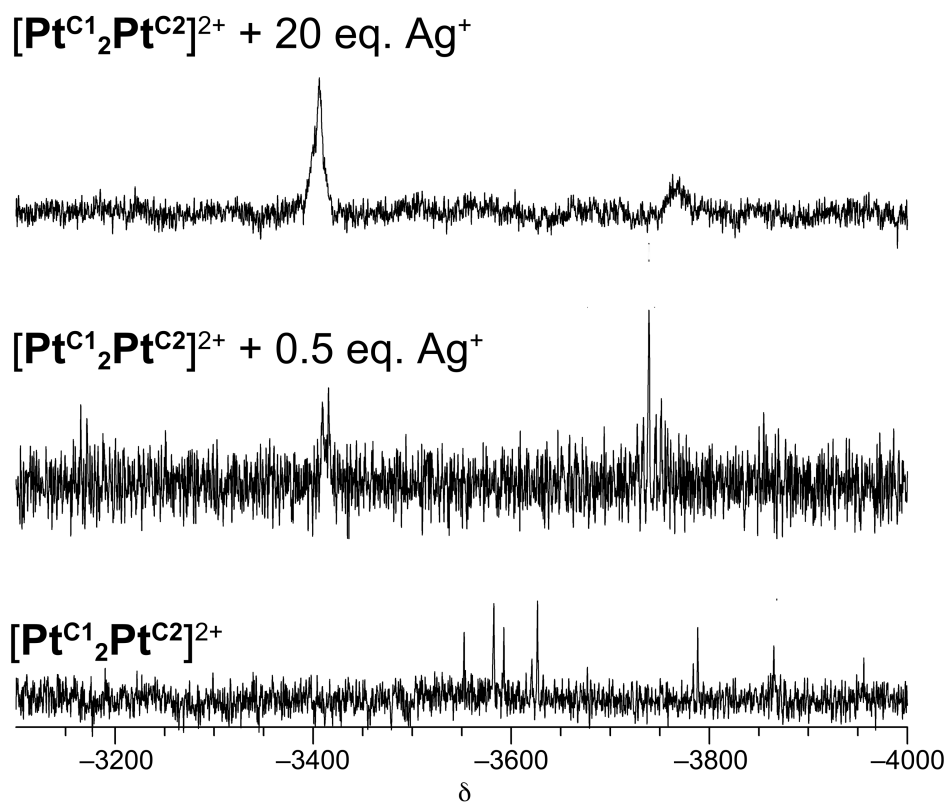

Fig. S14  $^{195}\text{Pt}$  NMR spectra for reactions of  $[\text{Pt}^{\text{C}1}_2\text{Pt}^{\text{C}2}]^{2+}$  with Ag(I) salt.



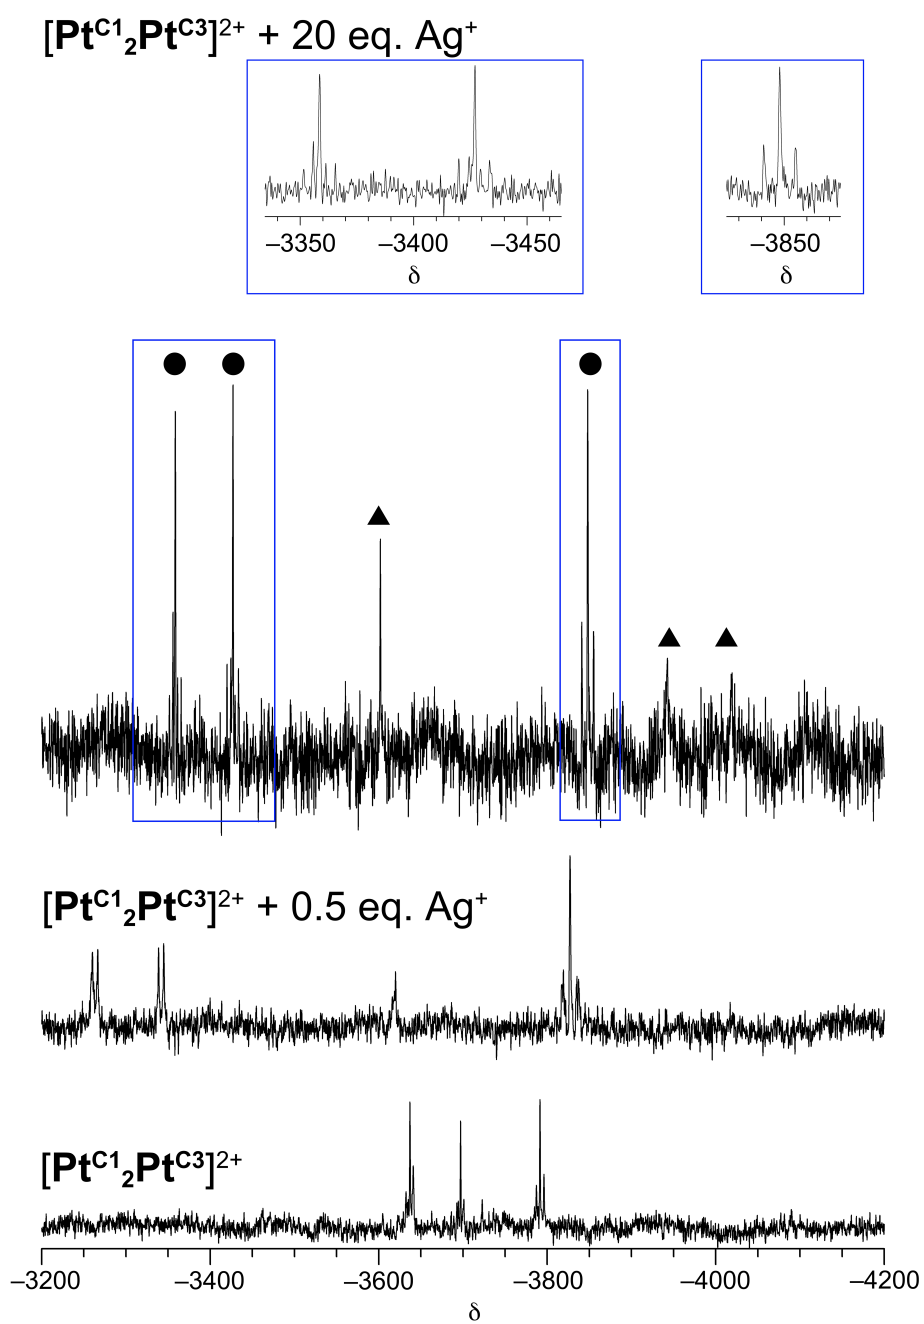

**Fig. S15**  $^{195}\text{Pt}$  NMR spectra for reactions of  $[\text{Pt}^{\text{C1}}_2\text{Pt}^{\text{C3}}]^{2+}$  with Ag(I) salt. The signals classified with black circles or triangles are assigned to each of Ag-adduct.

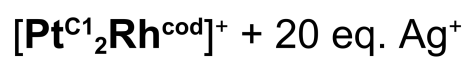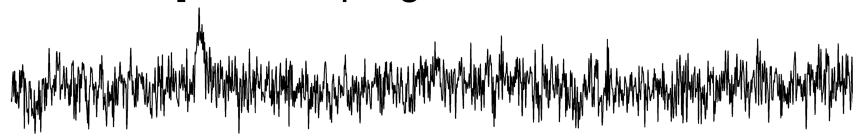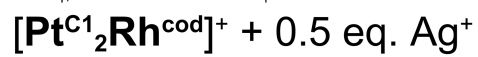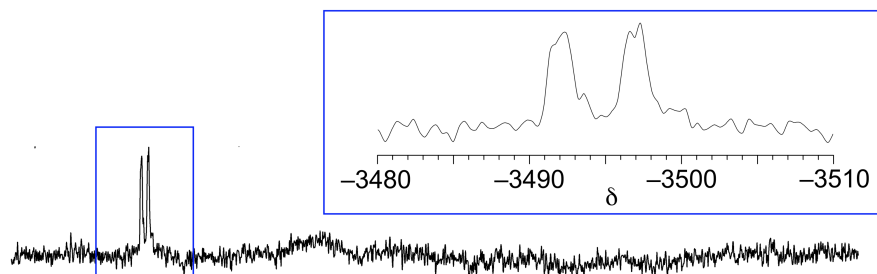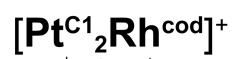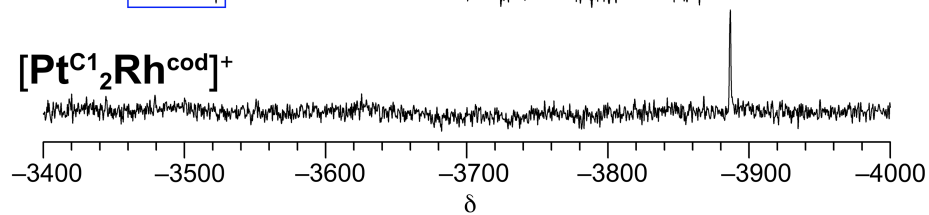

**Fig. S16**  $^{195}\text{Pt}$  NMR spectra for reactions of  $[\text{Pt}^{\text{C1}}_2\text{Rh}^{\text{cod}}]^+$  with Ag(I) salts in  $\text{CD}_3\text{CN}$ .

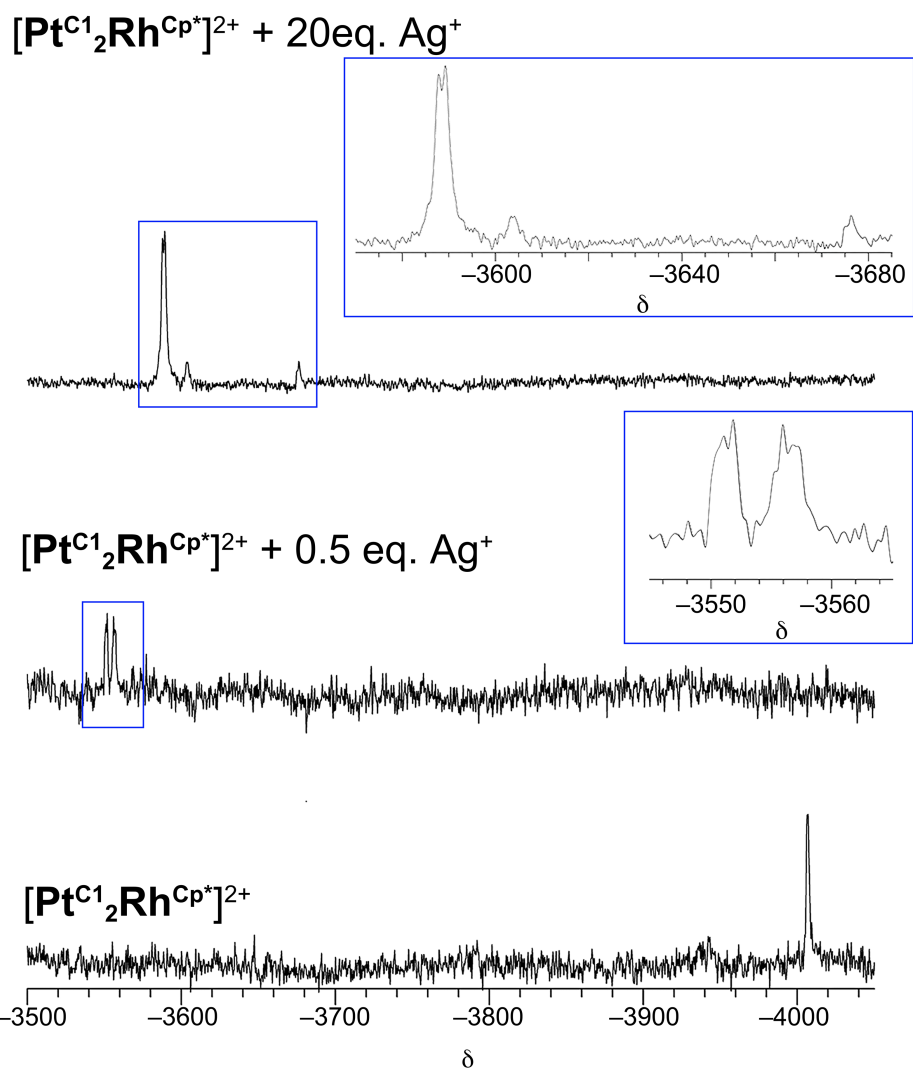

**Fig. S17**  $^{195}\text{Pt}$  NMR spectra for reactions of  $[\text{Pt}^{\text{C1}_2}\text{Rh}^{\text{Cp}^*}]^{2+}$  with Ag(I) salts in  $\text{CD}_3\text{CN}$ .

#### 4. X-ray crystallography

Crystallographic data are summarised in Tables S1–S9 for  $[\text{Pt}^{\text{C}2}_3](\text{PF}_6)_2$ ,  $[\text{Pt}^{\text{C}3}_3](\text{PF}_6)_2$ ,  $[\text{Pt}^{\text{C}1}_2\text{Pt}^{\text{C}2}](\text{PF}_6)_2$ ,  $[\text{Pt}^{\text{C}1}_2\text{Pt}^{\text{C}3}](\text{PF}_6)_2$ ,  $[\text{Pt}^{\text{C}1}_2\text{Rh}^{\text{Cp}^*}](\text{BPh}_4)_2$ ,  $[\text{Pt}^{\text{C}1}_2\text{Rh}^{\text{cod}}](\text{PF}_6)$ ,  $[\text{Ag}\{\text{Pt}(\text{bisNHC-C}2)\}_3\text{Ag}(\text{NCCH}_3)_3](\mu\text{-S})_2](\text{PF}_6)_7$ ,  $[\{\text{Pt}(\text{bisNHC-C}1)\}_2\{\text{Pt}(\text{bisNHC-C}3)\}(\mu\text{-S})_2\{\text{Ag}(\text{O}_2\text{PF}_2)\}\{\text{Ag}(\text{NCCH}_3)_{0.5}(\text{OCH}_3)_{0.5}\}(\mu\text{-O}_2\text{PF}_2)](\text{PF}_6)_{1.5}$  and  $[\{\text{Pt}(\text{bisNHC-C}3)\}_3\{\text{Ag}(\text{NCCH}_3)_3\}_2(\mu\text{-S})_2](\text{PF}_6)_4$ , respectively. Some of the structures contain positionally disordered atoms as follows.

##### $[\text{Pt}^{\text{C}1}_2\text{Pt}^{\text{C}2}](\text{PF}_6)_2$

Although electron densities attributed to one toluene molecule were found on the difference Fourier map, the toluene molecule in the crystal contained as a solvent for crystallisation was positionally disordered and least square refinement gave distorted structure and large temperature factors for the atoms of the solvent molecules. Because of the difficulty for the sufficient refinement, the solvent mask was applied using PLATON/SQUEEZE.<sup>1</sup>

##### $[\text{Pt}^{\text{C}1}_2\text{Pt}^{\text{C}3}](\text{PF}_6)_2$

Although electron densities attributed to two methanol molecules were found on the difference Fourier map, the molecules in the crystal contained as a solvent for crystallisation were positionally disordered and least square refinement gave distorted structure and large temperature factors for the atoms of the solvent molecules. Because of the difficulty for the sufficient refinement, the solvent mask was applied using PLATON/SQUEEZE.<sup>1</sup> Some of the F atoms in one of two  $\text{PF}_6$  anions were treated as positionally disordered.

##### $[\text{Pt}^{\text{C}1}_2\text{Rh}^{\text{Cp}^*}](\text{BPh}_4)_2$

Although electron densities attributed to three dichloromethane molecules were found on the difference Fourier map, the molecules in the crystal contained as a solvent for crystallisation were positionally disordered and least square refinement gave distorted structures and large temperature factors for the atoms of the solvent molecules. Because of the difficulty for the sufficient refinement, the solvent mask was

applied using PLATON/SQUEEZE.<sup>1</sup> The Cp\* ligand was also positionally disordered due to the rotation of the ligand. The structure was refined with two orientations of the ligand, which are related to each other by the crystallographic mirror plane.

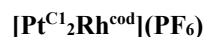

Although electron densities attributed to two acetonitrile molecules were found on the difference Fourier map, the molecules in the crystal contained as a solvent for crystallisation were positionally disordered and least square refinement gave distorted structures and large temperature factors for the atoms of the solvent molecules. Because of the difficulty for the sufficient refinement, the solvent mask was applied using SQUEEZE.<sup>1</sup> The cod ligand was also positionally disordered due to the mismatch of the cod ligand and the crystallographic C2 axis. The structure was refined with two orientations of the ligand, which are related to each other by the crystallographic C2 axis in the complex cation. Some of the F atoms in the PF<sub>6</sub> anion were also treated as positionally disordered.

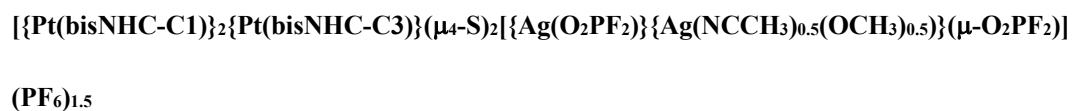

Although electron densities attributed to acetonitrile and methanol molecules were found on the difference Fourier map, the molecules in the crystal contained as a solvent for crystallisation were positionally disordered and least square refinement gave distorted structures and large temperature factors for the atoms of the solvent molecules. Because of the difficulty for the sufficient refinement, the solvent mask was applied using PLATON/SQUEEZE.<sup>1</sup> One water molecule was excluded the SQUEEZE calculation and its O atom was included in the refinement of the structure model. The F and O atoms of the bridging difluorophosphate ligands were treated with two orientations of the ligand. One of the two terminal ligands for Ag(I) ions was also disordered with acetonitrile and methoxy ligands in 1:1 ratio. The result of the analysis showed that the crystal contains 1.5 eq. of PF<sub>6</sub> anions meaning the pentanuclear complex has 1.5

positive charge. This strange positive charge is attributed to the disordered terminal ligand of Ag(I), which is a 1: 1 mixture of neutral acetonitrile and methoxy monoanion.

**Supplemental data of crystallographic analysis for  $[\{\text{Pt}(\text{bisNHC-C3})\}_3\{\text{Ag}(\text{NCCH}_3)_3\}_2(\mu_4\text{-S})_2](\text{PF}_6)_4$**

The  $\text{PF}_6$  anions are disordered and then some of the fluorine atoms could not be found in the difference Fourier maps. In the asymmetric unit, there are one and a half of the pentanuclear units. One of the two independent complex cations, which has a two-fold axis, exhibited huge disorder for the bisNHC ligands due to the crystallographic symmetry and insufficient quality of the crystal. The other showed the  $C_{3h}$ -isomeric form of the triplatinum unit as shown in the main text of the article. Although this analysis is not suitable for discussion about the detail of the structure, the obtained framework of the complex dication clearly indicate the formation of the Ag-adduct containing two Ag-S bonds with both of the sulfide ligands in the triplatinum complex along with the  $C_{3h}$ -isomeric form of the triplatinum unit in the adduct.

**Table S1.** Crystallographic data of triplatinum complex [Pt<sup>C2</sup>]<sub>3</sub>(PF<sub>6</sub>)<sub>2</sub> (CCDC 2238719).

|                                                                 |                                                                                                               |
|-----------------------------------------------------------------|---------------------------------------------------------------------------------------------------------------|
| Formula                                                         | C <sub>30</sub> H <sub>42</sub> F <sub>12</sub> N <sub>12</sub> P <sub>2</sub> Pt <sub>3</sub> S <sub>2</sub> |
| M <sub>w</sub>                                                  | 1510.06                                                                                                       |
| Crystal description                                             | colourless, prism                                                                                             |
| Crystal size/mm                                                 | 0.138 × 0.073 × 0.067                                                                                         |
| Crystal system                                                  | <i>monoclinic</i>                                                                                             |
| Space group                                                     | <i>P2<sub>1</sub>/c</i> (#14)                                                                                 |
| <i>a</i> /Å                                                     | 15.4330(11)                                                                                                   |
| <i>b</i> /Å                                                     | 15.7491(19)                                                                                                   |
| <i>c</i> /Å                                                     | 19.3229(15)                                                                                                   |
| $\alpha$ <sup>o</sup>                                           | 90                                                                                                            |
| $\beta$ <sup>o</sup>                                            | 91.050(3)                                                                                                     |
| $\gamma$ <sup>o</sup>                                           | 90                                                                                                            |
| <i>V</i> /Å <sup>3</sup>                                        | 4695.8(8)                                                                                                     |
| <i>Z</i>                                                        | 4                                                                                                             |
| F(000)                                                          | 2840.00                                                                                                       |
| $\rho_{\text{calcd}}$ /g cm <sup>-1</sup>                       | 2.136                                                                                                         |
| $\mu$ /mm <sup>-1</sup>                                         | 9.122                                                                                                         |
| Total reflections                                               | 47348                                                                                                         |
| Unique reflections ( <i>R</i> <sub>int</sub> )                  | 21456 (0.0457)                                                                                                |
| Scan range $\theta$ <sup>o</sup>                                | 27.445                                                                                                        |
| Completeness                                                    | 0.997                                                                                                         |
| Index ranges                                                    | -19 ≤ <i>h</i> ≤ 19<br>-20 ≤ <i>k</i> ≤ 19<br>-25 ≤ <i>l</i> ≤ 24                                             |
| Data/restrains/para.                                            | 10693/0/589                                                                                                   |
| <i>R</i> 1 [ <i>I</i> > 2σ( <i>I</i> )], <i>wR</i> 2 (all data) | 0.0513, 0.1073                                                                                                |
| GOF on <i>F</i> <sup>2</sup>                                    | 1.002                                                                                                         |
| Max./min. $\rho$ /eÅ <sup>-3</sup>                              | 2.40/-2.07                                                                                                    |
| Min./max. <i>T</i>                                              | 0.325/0.543                                                                                                   |

**Table S2.** Crystallographic data of triplatinum complex [Pt<sup>C33</sup>](PF<sub>6</sub>)<sub>2</sub>•CH<sub>3</sub>CN (CCDC 2238720).

|                                                                 |                                                                                                               |
|-----------------------------------------------------------------|---------------------------------------------------------------------------------------------------------------|
| Formula                                                         | C <sub>39</sub> H <sub>57</sub> F <sub>12</sub> N <sub>15</sub> P <sub>2</sub> Pt <sub>3</sub> S <sub>2</sub> |
| M <sub>w</sub>                                                  | 1675.28                                                                                                       |
| Crystal description                                             | colourless, prism                                                                                             |
| Crystal size/mm                                                 | 0.15 × 0.12 × 0.11                                                                                            |
| Crystal system                                                  | <i>hexagonal</i>                                                                                              |
| Space group                                                     | <i>P6<sub>3</sub>/m</i> (#176)                                                                                |
| <i>a</i> /Å                                                     | 14.1996(6)                                                                                                    |
| <i>b</i> /Å                                                     | = <i>a</i>                                                                                                    |
| <i>c</i> /Å                                                     | 16.3484(7)                                                                                                    |
| $\alpha$ <sup>o</sup>                                           | 90                                                                                                            |
| $\beta$ <sup>o</sup>                                            | 90                                                                                                            |
| $\gamma$ <sup>o</sup>                                           | 120                                                                                                           |
| <i>V</i> /Å <sup>3</sup>                                        | 2854.7(2)                                                                                                     |
| <i>Z</i>                                                        | 2                                                                                                             |
| F(000)                                                          | 1600.00                                                                                                       |
| $\rho_{\text{calcd}}$ /g cm <sup>-1</sup>                       | 1.949                                                                                                         |
| $\mu$ /mm <sup>-1</sup>                                         | 7.542                                                                                                         |
| Total reflections                                               | 95400                                                                                                         |
| Unique reflections ( <i>R</i> <sub>int</sub> )                  | 29775 (0.0442)                                                                                                |
| Scan range $\theta$ <sup>o</sup>                                | 27.495                                                                                                        |
| Completeness                                                    | 0.997                                                                                                         |
| Index ranges                                                    | -18 ≤ <i>h</i> ≤ 17<br>-18 ≤ <i>k</i> ≤ 18<br>-21 ≤ <i>l</i> ≤ 21                                             |
| Data/restraints/para.                                           | 2264/0/119                                                                                                    |
| <i>R</i> 1 [ <i>I</i> > 2σ( <i>I</i> )], <i>wR</i> 2 (all data) | 0.0328, 0.0653                                                                                                |
| GOF on <i>F</i> <sup>2</sup>                                    | 1.028                                                                                                         |
| Max./min. $\rho$ /eÅ <sup>-3</sup>                              | 2.33/-1.12                                                                                                    |
| Min./max. <i>T</i>                                              | 0.270/0.444                                                                                                   |



**Table S3.** Crystallographic data of triplatinum complex [Pt<sup>C1</sup><sub>2</sub>Pt<sup>C2</sup>](PF<sub>6</sub>)<sub>2</sub>•0.5toluene (CCDC 2238721).

---

|                                                                 |                                                                                                                 |
|-----------------------------------------------------------------|-----------------------------------------------------------------------------------------------------------------|
| Formula                                                         | C <sub>31.5</sub> H <sub>42</sub> F <sub>12</sub> N <sub>12</sub> P <sub>2</sub> Pt <sub>3</sub> S <sub>2</sub> |
| M <sub>w</sub>                                                  | 1528.08                                                                                                         |
| Crystal description                                             | colourless, prism                                                                                               |
| Crystal size/mm                                                 | 0.010 × 0.007 × 0.006                                                                                           |
| Crystal system                                                  | <i>triclinic</i>                                                                                                |
| Space group                                                     | <i>P</i> $\bar{1}$ (#2)                                                                                         |
| <i>a</i> /Å                                                     | 10.2266(3)                                                                                                      |
| <i>b</i> /Å                                                     | 13.0170(8)                                                                                                      |
| <i>c</i> /Å                                                     | 16.8232(11)                                                                                                     |
| $\alpha$ <sup>o</sup>                                           | 99.891(4)                                                                                                       |
| $\beta$ <sup>o</sup>                                            | 93.302(3)                                                                                                       |
| $\gamma$ <sup>o</sup>                                           | 90.379(2)                                                                                                       |
| <i>V</i> /Å <sup>3</sup>                                        | 2202.2(2)                                                                                                       |
| <i>Z</i>                                                        | 2                                                                                                               |
| F(000)                                                          | 1438.00                                                                                                         |
| $\rho_{\text{calcd}}$ /g cm <sup>-1</sup>                       | 2.304                                                                                                           |
| $\mu$ /mm <sup>-1</sup>                                         | 9.765                                                                                                           |
| Total reflections                                               | 30075                                                                                                           |
| Unique reflections ( <i>R</i> <sub>int</sub> )                  | 9933 (0.0265)                                                                                                   |
| Scan range $\theta$ <sup>o</sup>                                | 27.450                                                                                                          |
| Completeness                                                    | 0.991                                                                                                           |
| Index ranges                                                    | -13 ≤ <i>h</i> ≤ 13<br>-16 ≤ <i>k</i> ≤ 16<br>-21 ≤ <i>l</i> ≤ 21                                               |
| Data/restrains/para.                                            | 9933/0/538                                                                                                      |
| <i>R</i> 1 [ <i>I</i> > 2σ( <i>I</i> )], <i>wR</i> 2 (all data) | 0.0248, 0.0585                                                                                                  |
| GOF on <i>F</i> <sup>2</sup>                                    | 1.119                                                                                                           |
| Max./min. $\rho$ /eÅ <sup>-3</sup>                              | 2.596/-0.998                                                                                                    |
| Min./max. <i>T</i>                                              | 0.624/0.943                                                                                                     |

---

**Table S4.** Crystallographic data of triplatinum complex [Pt<sup>C1</sup><sub>2</sub>Pt<sup>C3</sup>](PF<sub>6</sub>)<sub>2</sub>•1.5CH<sub>3</sub>OH (CCDC 2238722).

---

|                                                                          |                                                                                                                                  |
|--------------------------------------------------------------------------|----------------------------------------------------------------------------------------------------------------------------------|
| Formula                                                                  | C <sub>30.5</sub> H <sub>46</sub> F <sub>12</sub> N <sub>12</sub> O <sub>1.5</sub> P <sub>2</sub> Pt <sub>3</sub> S <sub>2</sub> |
| M <sub>w</sub>                                                           | 1544.12                                                                                                                          |
| Crystal description                                                      | colourless, prism                                                                                                                |
| Crystal size/mm                                                          | 0.139 × 0.124 × 0.041                                                                                                            |
| Crystal system                                                           | <i>triclinic</i>                                                                                                                 |
| Space group                                                              | <i>P</i> $\bar{1}$ (#2)                                                                                                          |
| <i>a</i> /Å                                                              | 12.4809(2)                                                                                                                       |
| <i>b</i> /Å                                                              | 14.6151(5)                                                                                                                       |
| <i>c</i> /Å                                                              | 15.70520(10)                                                                                                                     |
| $\alpha$ <sup>o</sup>                                                    | 77.649(18)                                                                                                                       |
| $\beta$ <sup>o</sup>                                                     | 66.585(13)                                                                                                                       |
| $\gamma$ <sup>o</sup>                                                    | 77.483(17)                                                                                                                       |
| <i>V</i> /Å <sup>3</sup>                                                 | 2540.2(3)                                                                                                                        |
| <i>Z</i>                                                                 | 2                                                                                                                                |
| F(000)                                                                   | 1458.00                                                                                                                          |
| $\rho_{\text{calcd}}$ /g cm <sup>-1</sup>                                | 2.019                                                                                                                            |
| $\mu$ /mm <sup>-1</sup>                                                  | 8.469                                                                                                                            |
| Total reflections                                                        | 32367                                                                                                                            |
| Unique reflections ( <i>R</i> <sub>int</sub> )                           | 11397 (0.0347)                                                                                                                   |
| Scan range $\theta$ <sup>o</sup>                                         | 27.407                                                                                                                           |
| Completeness                                                             | 0.984                                                                                                                            |
| Index ranges                                                             | -16 ≤ <i>h</i> ≤ 16<br>-18 ≤ <i>k</i> ≤ 18<br>-20 ≤ <i>l</i> ≤ 20                                                                |
| Data/restraints/para.                                                    | 11397/0/547                                                                                                                      |
| <i>R</i> 1 [ <i>I</i> > 2 $\sigma$ ( <i>I</i> )], <i>wR</i> 2 (all data) | 0.0384, 0.0938                                                                                                                   |
| GOF on <i>F</i> <sup>2</sup>                                             | 1.062                                                                                                                            |
| Max./min. $\rho$ /eÅ <sup>-3</sup>                                       | 3.058/-3.280                                                                                                                     |
| Min./max. <i>T</i>                                                       | 0.536/0.708                                                                                                                      |

---

**Table S5.** Crystallographic data of diplatinum rhodium complex [Pt<sup>C1</sup><sub>2</sub>Rh<sup>Cp\*</sup>](BPh<sub>4</sub>)<sub>2</sub> (CCDC 2238723).

|                                                                 |                                                                                                                |
|-----------------------------------------------------------------|----------------------------------------------------------------------------------------------------------------|
| Formula                                                         | C <sub>79</sub> H <sub>85</sub> B <sub>2</sub> Cl <sub>6</sub> N <sub>8</sub> Pt <sub>2</sub> RhS <sub>2</sub> |
| M <sub>w</sub>                                                  | 1938.17                                                                                                        |
| Crystal description                                             | green, plate                                                                                                   |
| Crystal size/mm                                                 | 0.170 × 0.040 × 0.020                                                                                          |
| Crystal system                                                  | <i>monoclinic</i>                                                                                              |
| Space group                                                     | <i>Cm</i> (#8)                                                                                                 |
| <i>a</i> /Å                                                     | 17.827(4)                                                                                                      |
| <i>b</i> /Å                                                     | 25.802(4)                                                                                                      |
| <i>c</i> /Å                                                     | 13.476(3)                                                                                                      |
| $\alpha$ <sup>o</sup>                                           | 90                                                                                                             |
| $\beta$ <sup>o</sup>                                            | 128.641(5)                                                                                                     |
| $\gamma$ <sup>o</sup>                                           | 90                                                                                                             |
| <i>V</i> /Å <sup>3</sup>                                        | 4841.6(18)                                                                                                     |
| <i>Z</i>                                                        | 2                                                                                                              |
| F(000)                                                          | 1920                                                                                                           |
| $\rho_{\text{calcd}}$ /g cm <sup>-1</sup>                       | 1.329                                                                                                          |
| $\mu$ /mm <sup>-1</sup>                                         | 3.298                                                                                                          |
| Total reflections                                               | 29802                                                                                                          |
| Unique reflections ( <i>R</i> <sub>int</sub> )                  | 9154 (0.0606)                                                                                                  |
| Scan range $\theta$ <sup>o</sup>                                | 25.50                                                                                                          |
| Completeness                                                    | 0.997                                                                                                          |
| Index ranges                                                    | -22 ≤ <i>h</i> ≤ 22<br>-33 ≤ <i>k</i> ≤ 33<br>-17 ≤ <i>l</i> ≤ 17                                              |
| Data/restraints/para.                                           | 9154/365/412                                                                                                   |
| <i>R</i> 1 [ <i>I</i> > 2σ( <i>I</i> )], <i>wR</i> 2 (all data) | 0.0399, 0.1020                                                                                                 |
| GOF on <i>F</i> <sup>2</sup>                                    | 0.8978                                                                                                         |
| Max./min. $\rho$ /eÅ <sup>-3</sup>                              | 1.342/-1.250                                                                                                   |
| Min./max. <i>T</i>                                              | 0.574/0.936                                                                                                    |

**Table S6.** Crystallographic data of diplatinum rhodium complex [Pt<sup>C1</sup><sub>2</sub>Rh<sup>cod</sup>](PF<sub>6</sub>)•2CH<sub>3</sub>CN (CCDC 2238724).

|                                                                 |                                                                                                 |
|-----------------------------------------------------------------|-------------------------------------------------------------------------------------------------|
| Formula                                                         | C <sub>30</sub> H <sub>42</sub> F <sub>6</sub> N <sub>10</sub> Pt <sub>2</sub> RhS <sub>2</sub> |
| M <sub>w</sub>                                                  | 1285.95                                                                                         |
| Crystal description                                             | yellow, prism                                                                                   |
| Crystal size/mm                                                 | 0.143 × 0.089 × 0.031                                                                           |
| Crystal system                                                  | <i>tetragonal</i>                                                                               |
| Space group                                                     | <i>I4</i> <sub>1</sub> (#80)                                                                    |
| <i>a</i> /Å                                                     | 12.3687(11)                                                                                     |
| <i>b</i> /Å                                                     | = <i>a</i>                                                                                      |
| <i>c</i> /Å                                                     | 27.8127(18)                                                                                     |
| $\alpha$ <sup>o</sup>                                           | 90                                                                                              |
| $\beta$ <sup>o</sup>                                            | 90                                                                                              |
| $\gamma$ <sup>o</sup>                                           | 90                                                                                              |
| <i>V</i> /Å <sup>3</sup>                                        | 4254.9(6)                                                                                       |
| <i>Z</i>                                                        | 4                                                                                               |
| F(000)                                                          | 2376.00                                                                                         |
| $\rho_{\text{calcd}}$ /g cm <sup>-1</sup>                       | 2.007                                                                                           |
| $\mu$ /mm <sup>-1</sup>                                         | 7.141                                                                                           |
| Total reflections                                               | 21520                                                                                           |
| Unique reflections ( <i>R</i> <sub>int</sub> )                  | 4875 (0.0534)                                                                                   |
| Scan range $\theta$ <sup>o</sup>                                | 27.489                                                                                          |
| Completeness                                                    | 0.997                                                                                           |
| Index ranges                                                    | -16 ≤ <i>h</i> ≤ 16<br>-16 ≤ <i>k</i> ≤ 16<br>-36 ≤ <i>l</i> ≤ 35                               |
| Data/restraints/para.                                           | 4875/290/263                                                                                    |
| <i>R</i> 1 [ <i>I</i> > 2σ( <i>I</i> )], <i>wR</i> 2 (all data) | 0.0492, 0.1169                                                                                  |
| GOF on <i>F</i> <sup>2</sup>                                    | 1.006                                                                                           |
| Max./min. $\rho$ /eÅ <sup>-3</sup>                              | 1.801/-2.219                                                                                    |
| Min./max. <i>T</i>                                              | 0.596/0.802                                                                                     |
| Flack parameter                                                 | 0.042(6)                                                                                        |

**Table S7.** Crystallographic data of Ag-adduct  $[\text{Ag}\{\text{Pt}(\text{bisNHC-C2})_3[\text{Ag}(\text{NCCH}_3)_3](\mu_4\text{-S})_2\}_2](\text{PF}_6)_7$  (CCDC 2238725).

|                                             |                                                                                                   |
|---------------------------------------------|---------------------------------------------------------------------------------------------------|
| Formula                                     | $\text{C}_{72}\text{H}_{102}\text{Ag}_3\text{F}_{42}\text{N}_{30}\text{P}_7\text{Pt}_6\text{S}_4$ |
| $M_w$                                       | 4024.93                                                                                           |
| Crystal description                         | colourless, prism                                                                                 |
| Crystal size/mm                             | $0.196 \times 0.063 \times 0.010$                                                                 |
| Crystal system                              | <i>triclinic</i>                                                                                  |
| Space group                                 | $P\bar{1}$ (#2)                                                                                   |
| $a/\text{\AA}$                              | 16.814(7)                                                                                         |
| $b/\text{\AA}$                              | 17.820(7)                                                                                         |
| $c/\text{\AA}$                              | 22.082(9)                                                                                         |
| $\alpha^\circ$                              | 101.846(7)                                                                                        |
| $\beta^\circ$                               | 92.738(12)                                                                                        |
| $\gamma^\circ$                              | 92.657(5)                                                                                         |
| $V/\text{\AA}^3$                            | 6458(5)                                                                                           |
| $Z$                                         | 2                                                                                                 |
| F(000)                                      | 3800.00                                                                                           |
| $\rho_{\text{calcd}}/\text{g cm}^{-3}$      | 2.070                                                                                             |
| $\mu/\text{mm}^{-1}$                        | 7.149                                                                                             |
| Total reflections                           | 66567                                                                                             |
| Unique reflections ( $R_{\text{int}}$ )     | 29011 (0.0486)                                                                                    |
| Scan range $\theta^\circ$                   | 27.478                                                                                            |
| Completeness                                | 0.980                                                                                             |
| Index ranges                                | $-21 \leq h \leq 21$<br>$-22 \leq k \leq 23$<br>$-26 \leq l \leq 28$                              |
| Data/restraints/para.                       | 29011/0/1483                                                                                      |
| $R1$ [ $I > 2\sigma(I)$ ], $wR2$ (all data) | 0.0625, 0.1643                                                                                    |
| GOF on $F^2$                                | 1.016                                                                                             |
| Max./min. $\rho/\text{e}\text{\AA}^{-3}$    | 3.22/−2.40                                                                                        |
| Min./max. $T$                               | 0.628/0.931                                                                                       |

**Table S8.** Crystallographic data of Ag-adduct  $[\{\text{Pt}(\text{bisNHC-C1})\}_2\{\text{Pt}(\text{bisNHC-C3})\}(\mu_4\text{-S})_2\{\text{Ag}(\text{O}_2\text{PF}_2)\}_2\{\text{Ag}(\text{NCCH}_3)_{0.5}(\text{OCH}_3)_{0.5}\}(\mu\text{-O}_2\text{PF}_2)](\text{PF}_6)_{1.5}\cdot\text{CH}_3\text{CN}\cdot\text{CH}_3\text{OH}\cdot\text{H}_2\text{O}$  (CCDC 2238726).

|                                             |                                                                                                                        |
|---------------------------------------------|------------------------------------------------------------------------------------------------------------------------|
| Formula                                     | $\text{C}_{33.5}\text{H}_{52}\text{Ag}_2\text{F}_{13}\text{N}_{13.5}\text{O}_{6.5}\text{P}_{3.5}\text{Pt}_3\text{S}_2$ |
| $M_w$                                       | 2015.22                                                                                                                |
| Crystal description                         | colourless, platelet                                                                                                   |
| Crystal size/mm                             | $0.204 \times 0.038 \times 0.012$                                                                                      |
| Crystal system                              | <i>monoclinic</i>                                                                                                      |
| Space group                                 | $P2_1/c$ (#14)                                                                                                         |
| $a/\text{\AA}$                              | 24.235(2)                                                                                                              |
| $b/\text{\AA}$                              | 12.8335(9)                                                                                                             |
| $c/\text{\AA}$                              | 20.6397(18)                                                                                                            |
| $\alpha^\circ$                              | 90                                                                                                                     |
| $\beta^\circ$                               | 112.905(2)                                                                                                             |
| $\gamma^\circ$                              | 90                                                                                                                     |
| $V/\text{\AA}^3$                            | 5913.2(8)                                                                                                              |
| $Z$                                         | 4                                                                                                                      |
| $F(000)$                                    | 3702.00                                                                                                                |
| $\rho_{\text{calcd}}/\text{g cm}^{-3}$      | 2.264                                                                                                                  |
| $\mu/\text{mm}^{-1}$                        | 7.982                                                                                                                  |
| Total reflections                           | 59421                                                                                                                  |
| Unique reflections ( $R_{\text{int}}$ )     | 13383 (0.0547)                                                                                                         |
| Scan range $\theta^\circ$                   | 27.402                                                                                                                 |
| Completeness                                | 0.994                                                                                                                  |
| Index ranges                                | $-31 \leq h \leq 31$<br>$-16 \leq k \leq 16$<br>$-26 \leq l \leq 26$                                                   |
| Data/restraints/para.                       | 13383/56/660                                                                                                           |
| $R1$ [ $I > 2\sigma(I)$ ], $wR2$ (all data) | 0.0684, 0.1283                                                                                                         |
| GOF on $F^2$                                | 1.039                                                                                                                  |
| Max./min. $\rho/\text{e}\text{\AA}^{-3}$    | 2.382 / -2.865                                                                                                         |
| Min./max. $T$                               | 0.687/0.909                                                                                                            |

**Table S9.** Preliminary crystallographic data of Ag-adduct  $[\{\text{Pt}(\text{bisNHC-C3})\}_3\{\text{Ag}(\text{NCCH}_3)_3\}_2(\mu_4\text{-S})_2](\text{PF}_6)_4$ .

|                                          |                                                                                         |
|------------------------------------------|-----------------------------------------------------------------------------------------|
| Formula                                  | $\text{C}_{45}\text{H}_{66}\text{AgF}_{24}\text{N}_{18}\text{P}_4\text{Pt}_3\text{S}_2$ |
| $M_w$                                    | 1362.57                                                                                 |
| Crystal description                      | colourless, prism                                                                       |
| Crystal size/mm                          | $0.174 \times 0.075 \times 0.070$                                                       |
| Crystal system                           | <i>orthorhombic</i>                                                                     |
| Space group                              | <i>Pbcn</i> (#60)                                                                       |
| $a/\text{\AA}$                           | 43.897(18)                                                                              |
| $b/\text{\AA}$                           | 25.323(11)                                                                              |
| $c/\text{\AA}$                           | 25.885(11)                                                                              |
| $\alpha^\circ$                           | 90                                                                                      |
| $\beta^\circ$                            | 90                                                                                      |
| $\gamma^\circ$                           | 90                                                                                      |
| $V/\text{\AA}^3$                         | 28773(21)                                                                               |
| $Z$                                      | 12                                                                                      |
| F(000)                                   | 13176.00                                                                                |
| $\rho_{\text{calcd}}/\text{g cm}^{-3}$   | 1.596                                                                                   |
| $\mu/\text{mm}^{-1}$                     | 4.935                                                                                   |
| Total reflections                        | 134995                                                                                  |
| Unique reflections ( $R_{\text{int}}$ )  | 30075 (0.0722)                                                                          |
| Scan range $\theta^\circ$                | 26.940                                                                                  |
| Completeness                             | 0.964                                                                                   |
| Index ranges                             | $-55 \leq h \leq 47$<br>$-30 \leq k \leq 28$<br>$-32 \leq l \leq 32$                    |
| Data/restraints/para.                    | 30075/0/649                                                                             |
| $R1 [I > 2\sigma(I)]$ , $wR2$ (all data) | 0.0651, 0.1813                                                                          |
| GOF on $F^2$                             | 1.095                                                                                   |
| Max./min. $\rho/\text{e}\text{\AA}^{-3}$ | 10.10/−6.68                                                                             |
| Min./max. $T$                            | 0.511/0.708                                                                             |

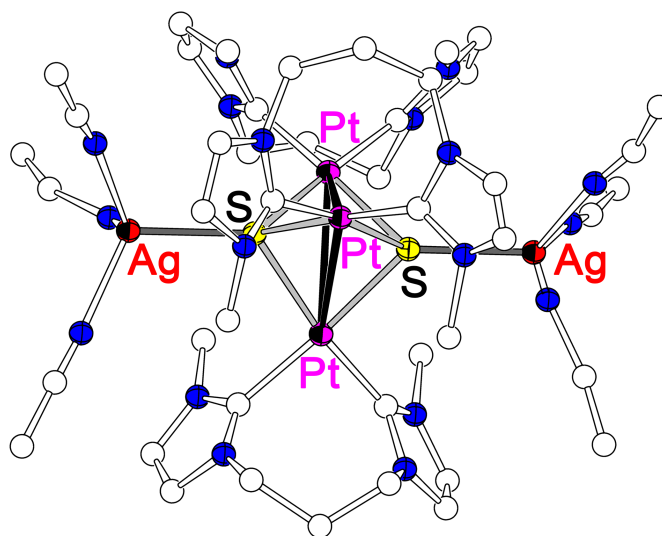

**Fig. S18** Supplementary data for structure of pentanuclear Ag-adduct of triplatinum complex bearing three bisNHC-C3 ligands.

## 5. DFT calculations

**Table S10.** Optimised atomic coordinates of triplatinum complex  $[\text{Pt}^{\text{C1}}_2\text{Rh}^{\text{Cp}^*}]^{2+}$  obtained from DFT calculations.

| Number | atom | x         | y         | z         |
|--------|------|-----------|-----------|-----------|
| 1      | Pt   | 1.637181  | -0.667715 | 0.002490  |
| 2      | Pt   | -1.706967 | -0.551709 | 0.002792  |
| 3      | Rh   | 0.105700  | 2.157372  | -0.003892 |
| 4      | S    | -0.000588 | 0.328573  | 1.597454  |
| 5      | S    | -0.000404 | 0.323096  | -1.595207 |
| 6      | N    | 3.367659  | -2.784447 | 1.199640  |
| 7      | N    | 3.368461  | -1.098487 | 2.578258  |
| 8      | N    | 3.356043  | -2.790970 | -1.199707 |
| 9      | N    | 3.343376  | -1.110035 | -2.584516 |
| 10     | N    | -3.581106 | -2.537496 | 1.208386  |
| 11     | N    | -3.453785 | -0.853420 | 2.583679  |
| 12     | N    | -3.582000 | -2.543680 | -1.190616 |
| 13     | N    | -3.457102 | -0.865738 | -2.573580 |
| 14     | C    | 2.844136  | -1.515928 | 1.380081  |
| 15     | C    | 4.200030  | -3.151979 | 2.269485  |
| 16     | C    | 4.193498  | -2.092749 | 3.136558  |
| 17     | C    | 3.153120  | 0.210721  | 3.217586  |
| 18     | C    | 3.067971  | -3.577181 | 0.003666  |
| 19     | C    | 2.832939  | -1.522663 | -1.378930 |
| 20     | C    | 4.174091  | -3.164426 | -2.278459 |
| 21     | C    | 4.158668  | -2.108356 | -3.149671 |
| 22     | C    | 3.108823  | 0.194096  | -3.227734 |
| 23     | C    | -0.361699 | 4.089113  | 1.103234  |
| 24     | C    | 0.019384  | 4.064969  | -1.247974 |
| 25     | C    | -2.968294 | -1.316586 | -1.372426 |
| 26     | C    | -4.434110 | -2.853794 | -2.263181 |
| 27     | C    | -4.348423 | -1.800271 | -3.133037 |



|    |   |           |           |           |
|----|---|-----------|-----------|-----------|
| 28 | C | -3.144526 | 0.422924  | -3.214509 |
| 29 | C | -3.348938 | -3.350266 | 0.010890  |
| 30 | C | -2.967006 | -1.309610 | 1.383733  |
| 31 | C | -4.431562 | -2.842719 | 2.283676  |
| 32 | C | -4.344373 | -1.785314 | 3.148632  |
| 33 | C | -3.139559 | 0.437385  | 3.219711  |
| 34 | C | 1.050956  | 4.013815  | 0.887684  |
| 35 | C | 1.289835  | 3.977972  | -0.573400 |
| 36 | C | -1.011685 | 4.066086  | -0.218223 |
| 37 | C | 2.123709  | 4.071510  | 1.934938  |
| 38 | C | -1.064186 | 4.241126  | 2.421640  |
| 39 | C | -0.204230 | 4.185659  | -2.728375 |
| 40 | C | -2.486026 | 4.192404  | -0.454141 |
| 41 | C | 2.643946  | 3.988283  | -1.217078 |
| 42 | H | 4.705566  | -4.102193 | 2.327810  |
| 43 | H | 4.698411  | -1.962412 | 4.079931  |
| 44 | H | 2.566939  | 0.090809  | 4.134014  |
| 45 | H | 2.606436  | 0.855136  | 2.530737  |
| 46 | H | 4.120854  | 0.662297  | 3.459200  |
| 47 | H | 3.677698  | -4.482933 | 0.003264  |
| 48 | H | 2.008680  | -3.851561 | 0.009389  |
| 49 | H | 4.678318  | -4.115192 | -2.338746 |
| 50 | H | 4.652323  | -1.982977 | -4.099595 |
| 51 | H | 4.053202  | 0.572702  | -3.630869 |
| 52 | H | 2.720876  | 0.891575  | -2.485894 |
| 53 | H | 2.378046  | 0.093423  | -4.035984 |
| 54 | H | -5.006760 | -3.765153 | -2.320912 |
| 55 | H | -4.839163 | -1.637074 | -4.078753 |
| 56 | H | -2.591412 | 1.043950  | -2.510757 |
| 57 | H | -4.076004 | 0.923681  | -3.497463 |
| 58 | H | -2.529659 | 0.262869  | -4.105609 |
| 59 | H | -4.027954 | -4.205421 | 0.013360  |
| 60 | H | -2.315023 | -3.708285 | 0.011439  |
| 61 | H | -5.004171 | -3.753766 | 2.346459  |
| 62 | H | -4.833527 | -1.617754 | 4.094408  |
| 63 | H | -2.581588 | 1.053697  | 2.515922  |
| 64 | H | -2.528216 | 0.279462  | 4.113593  |
| 65 | H | -4.070411 | 0.942343  | 3.497326  |
| 66 | H | 1.762121  | 3.720040  | 2.905913  |
| 67 | H | 2.464861  | 5.108931  | 2.066144  |
| 68 | H | 2.999327  | 3.476503  | 1.654853  |
| 69 | H | -0.524700 | 3.740570  | 3.231628  |
| 70 | H | -2.080756 | 3.836426  | 2.389381  |
| 71 | H | -1.145775 | 5.305425  | 2.685536  |
| 72 | H | -2.779344 | 3.801321  | -1.432665 |
| 73 | H | -2.774606 | 5.254107  | -0.424243 |
| 74 | H | -3.069213 | 3.674316  | 0.313380  |
| 75 | H | 0.586884  | 3.693680  | -3.302313 |
| 76 | H | -0.219987 | 5.244077  | -3.025016 |
| 77 | H | -1.158540 | 3.745259  | -3.033429 |
| 78 | H | 2.604541  | 3.647474  | -2.255789 |
| 79 | H | 3.359642  | 3.363003  | -0.672813 |
| 80 | H | 3.045011  | 5.012852  | -1.222765 |

**Table S11.** Optimised atomic coordinates of triplatinum complex  $[\text{Pt}^{\text{C1}}_2\text{Rh}^{\text{cod}}]^+$  obtained from DFT calculations.

| Number | atom | x         | y         | z         |
|--------|------|-----------|-----------|-----------|
| 1      | Pt   | 1.682984  | -0.536633 | -0.006634 |
| 2      | Pt   | -1.682964 | -0.536636 | 0.006574  |
| 3      | Rh   | 0.000075  | 2.268159  | 0.000379  |
| 4      | S    | 0.005122  | 0.342271  | 1.593698  |
| 5      | S    | -0.005141 | 0.342792  | -1.593494 |
| 6      | N    | 3.575866  | -2.515301 | 1.180005  |
| 7      | N    | 3.441175  | -0.838571 | 2.564517  |
| 8      | N    | 3.568509  | -2.505399 | -1.221672 |
| 9      | N    | 3.425224  | -0.815943 | -2.589945 |
| 10     | N    | -3.568408 | -2.506070 | 1.220648  |
| 11     | N    | -3.425241 | -0.817314 | 2.589798  |
| 12     | N    | -3.575871 | -2.514722 | -1.181030 |
| 13     | N    | -3.441410 | -0.837093 | -2.564480 |
| 14     | C    | 2.943765  | -1.293822 | 1.365954  |
| 15     | C    | 4.444519  | -2.812714 | 2.243297  |
| 16     | C    | 4.351109  | -1.759934 | 3.114435  |
| 17     | C    | 3.111988  | 0.451034  | 3.194532  |
| 18     | C    | 3.333654  | -3.315189 | -0.023472 |
| 19     | C    | 2.935112  | -1.282596 | -1.392841 |
| 20     | C    | 4.430990  | -2.792783 | -2.292753 |
| 21     | C    | 4.332140  | -1.732007 | -3.153577 |
| 22     | C    | 3.091934  | 0.479375  | -3.206461 |
| 23     | C    | -0.658427 | 3.836478  | 1.398138  |
| 24     | C    | -0.753773 | 3.705265  | -1.454167 |
| 25     | C    | -2.943813 | -1.293120 | -1.366301 |
| 26     | C    | -4.444646 | -2.811477 | -2.244395 |
| 27     | C    | -4.351401 | -1.758120 | -3.114866 |
| 28     | C    | -3.112092 | 0.452870  | -3.193701 |
| 29     | C    | -3.333503 | -3.315211 | 0.022026  |
| 30     | C    | -2.935027 | -1.283327 | 1.392489  |
| 31     | C    | -4.430946 | -2.794018 | 2.291521  |
| 32     | C    | -4.332224 | -1.733661 | 3.152870  |
| 33     | C    | -3.092163 | 0.477727  | 3.207014  |
| 34     | C    | -1.393583 | 4.978799  | 0.689475  |
| 35     | C    | 0.753873  | 3.705131  | 1.455012  |
| 36     | C    | 0.658521  | 3.836572  | -1.397292 |
| 37     | C    | -1.765471 | 4.626464  | -0.780305 |
| 38     | C    | 1.393605  | 4.978838  | -0.688459 |
| 39     | C    | 1.765504  | 4.626359  | 0.781212  |
| 40     | H    | 5.030297  | -3.715942 | 2.295247  |
| 41     | H    | 4.847114  | -1.589813 | 4.056060  |
| 42     | H    | 2.461399  | 0.296636  | 4.060961  |
| 43     | H    | 2.585228  | 1.071082  | 2.469632  |
| 44     | H    | 4.035570  | 0.949272  | 3.508132  |
| 45     | H    | 4.001237  | -4.180016 | -0.029023 |
| 46     | H    | 2.292537  | -3.653792 | -0.021689 |
| 47     | H    | 5.016660  | -3.695318 | -2.356520 |
| 48     | H    | 4.822429  | -1.553173 | -4.096577 |
| 49     | H    | 4.013484  | 0.977944  | -3.525459 |
| 50     | H    | 2.573801  | 1.095440  | -2.471847 |
| 51     | H    | 2.432526  | 0.332773  | -4.067515 |
| 52     | H    | -5.030449 | -3.714661 | -2.296841 |
| 53     | H    | -4.847543 | -1.587415 | -4.056311 |
| 54     | H    | -2.587823 | 1.073525  | -2.467494 |

|    |   |           |           |           |
|----|---|-----------|-----------|-----------|
| 55 | H | -4.035477 | 0.950046  | -3.509533 |
| 56 | H | -2.459192 | 0.299245  | -4.058521 |
| 57 | H | -4.000936 | -4.180155 | 0.027162  |
| 58 | H | -2.292327 | -3.653625 | 0.020007  |
| 59 | H | -5.016582 | -3.696609 | 2.354821  |
| 60 | H | -4.822613 | -1.555286 | 4.095906  |
| 61 | H | -2.572448 | 1.093547  | 2.473328  |
| 62 | H | -2.434269 | 0.330583  | 4.069139  |
| 63 | H | -4.013913 | 0.976850  | 3.524588  |
| 64 | H | 2.736017  | 4.112204  | 0.786812  |
| 65 | H | 1.898750  | 5.550554  | 1.369563  |
| 66 | H | 1.155780  | 3.115720  | 2.280271  |
| 67 | H | -1.226679 | 3.322832  | 2.173759  |
| 68 | H | -0.781132 | 5.888179  | 0.717331  |
| 69 | H | -2.312802 | 5.213526  | 1.241448  |
| 70 | H | -2.735977 | 4.112293  | -0.785996 |
| 71 | H | -1.898712 | 5.550749  | -1.368519 |
| 72 | H | -1.155702 | 3.115849  | -2.279406 |
| 73 | H | 1.226751  | 3.323127  | -2.173073 |
| 74 | H | 0.780936  | 5.888086  | -0.716222 |
| 75 | H | 2.312743  | 5.213835  | -1.240460 |

## 6. $^1\text{H}$ and $^{13}\text{C}$ NMR spectroscopy

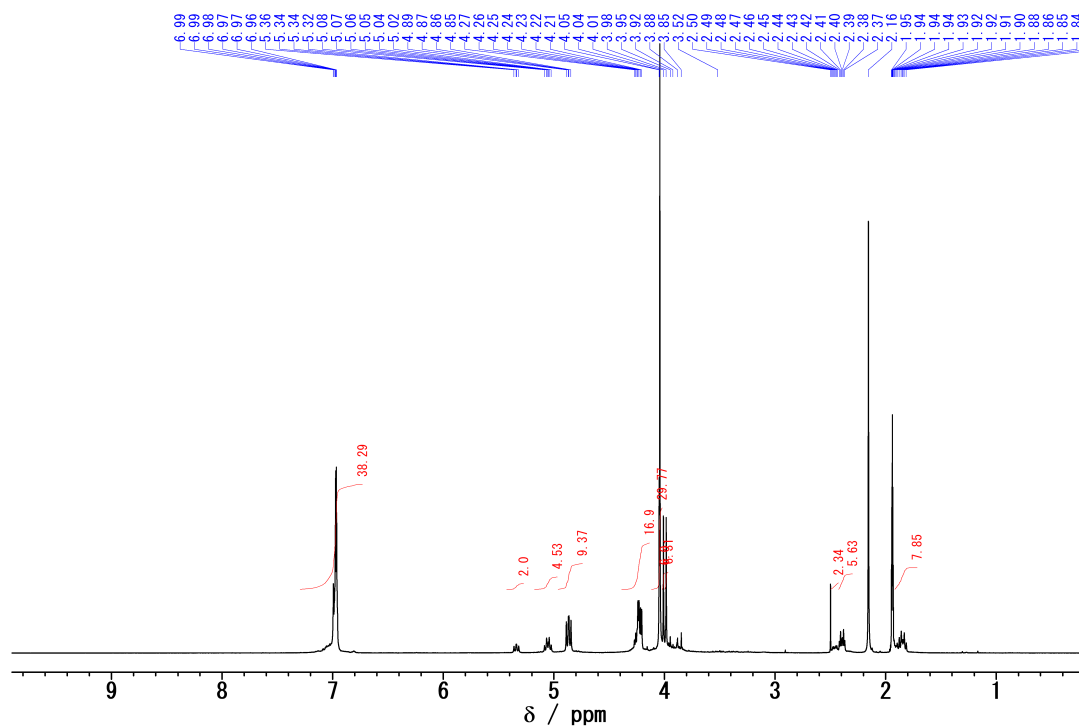

**Fig. S19**  $^1\text{H}$  NMR spectrum of  $[\text{Pt}^{\text{C}3_3}](\text{PF}_6)_2$  ( $\text{CD}_3\text{CN}$ , 600 MHz, 293 K):

$C_{3h}$ -isomer:  $\delta$  6.99–9.96 (m, 4,5-im), 4.87 (dd,  $^2J_{\text{H-H}} = 14.3$  Hz,  $^3J_{\text{H-H}} = 10.9$  Hz, 6H, N- $\text{CH}_2^-$ ), 4.22 (dd,  $^2J_{\text{H-H}} = 14.2$  Hz,  $^3J_{\text{H-H}} = 6.4$  Hz, 6H, N- $\text{CH}_2^-$ ), 4.04 (s, 18H, N-Me), 2.39 (ddd,  $^2J_{\text{H-H}} = 13.3$  Hz,  $^3J_{\text{H-H}} = 6.7$  Hz,  $^3J_{\text{H-H}} = 6.7$  Hz, 3H, - $\text{CH}_2^-$ ), 1.85 (ddd,  $^2J_{\text{H-H}} = 16.3$  Hz,  $^3J_{\text{H-H}} = 10.8$  Hz,  $^3J_{\text{H-H}} = 10.8$  Hz, 3H, - $\text{CH}_2^-$ ).

$C_s$ -isomer:  $\delta$  6.99–9.96 (m, 4,5-im), 5.34 (dd,  $^2J_{\text{H-H}} = 14.1$  Hz,  $^3J_{\text{H-H}} = 11.6$  Hz, 2H, N- $\text{CH}_2^-$ ), 5.05 (ddd,  $^2J_{\text{H-H}} = 14.2$  Hz,  $^3J_{\text{H-H}} = 11.0$  Hz,  $^3J_{\text{H-H}} = 11.0$  Hz, 4H, N- $\text{CH}_2^-$ ), 4.25 (dd,  $^2J_{\text{H-H}} = 14.1$  Hz,  $^3J_{\text{H-H}} = 6.9$  Hz, 6H, N- $\text{CH}_2^-$ ), 4.05 (s, 6H, N-Me), 4.01 (s, 6H, N-Me), 3.98 (s, 6H, N-Me), 2.46 (ddd,  $^2J_{\text{H-H}} = 16.5$  Hz,  $^3J_{\text{H-H}} = 11.1$  Hz,  $^3J_{\text{H-H}} = 5.6$  Hz, 3H, - $\text{CH}_2^-$ ), 1.90–1.92 (m, 3H, - $\text{CH}_2^-$ ).

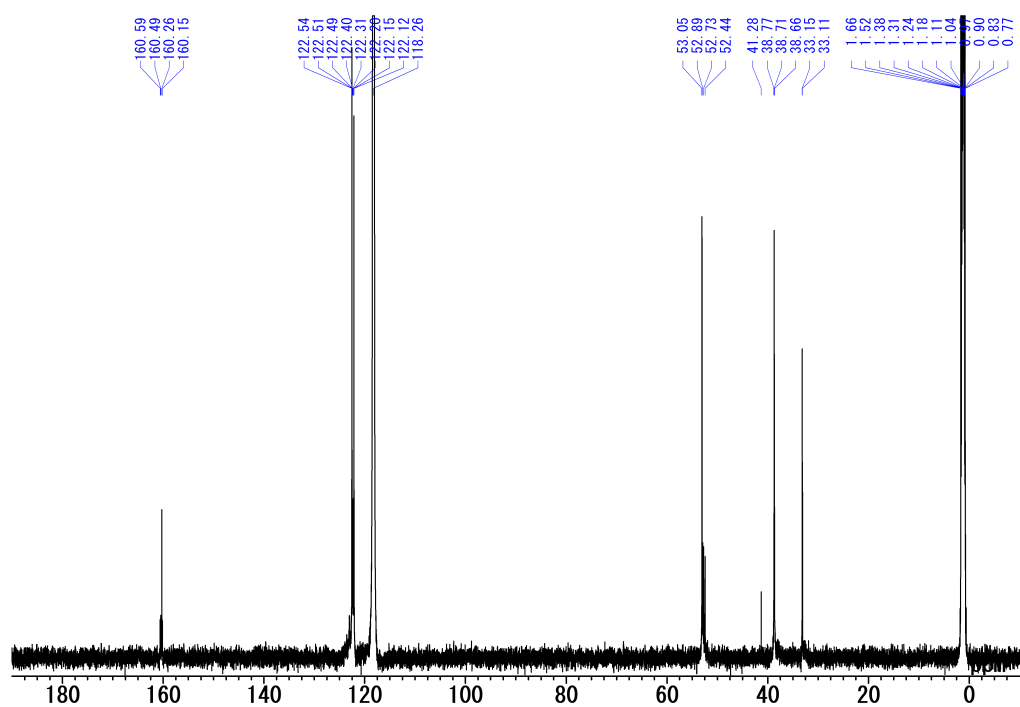

**Fig. S20**  $^{13}\text{C}$  NMR spectrum of  $[\text{Pt}^{\text{C}_3}](\text{PF}_6)_2$  ( $\text{CD}_3\text{CN}$ , 150 MHz, 293 K):

$C_{3h}$ -isomer:  $\delta$  160.3 (2-im), 122.5 (4,5-im), 122.1 (4,5-im), 53.1 (N- $\text{CH}_2$ ), 38.8 (N-Me), 33.2 (- $\text{CH}_2$ -).

$C_s$ -isomer:  $\delta$  160.6 (2-im), 160.5 (2-im), 160.2 (2-im), 122.51 (4,5-im), 122.49 (4,5-im), 122.39 (4,5-im), 122.31 (4,5-im), 122.26 (4,5-im), 122.2 (4,5-im), 52.9 (N- $\text{CH}_2$ ), 52.7 (N- $\text{CH}_2$ ), 52.4 (N- $\text{CH}_2$ ), 38.8 (N-Me), 38.7 (N-Me), 33.1 (- $\text{CH}_2$ -).



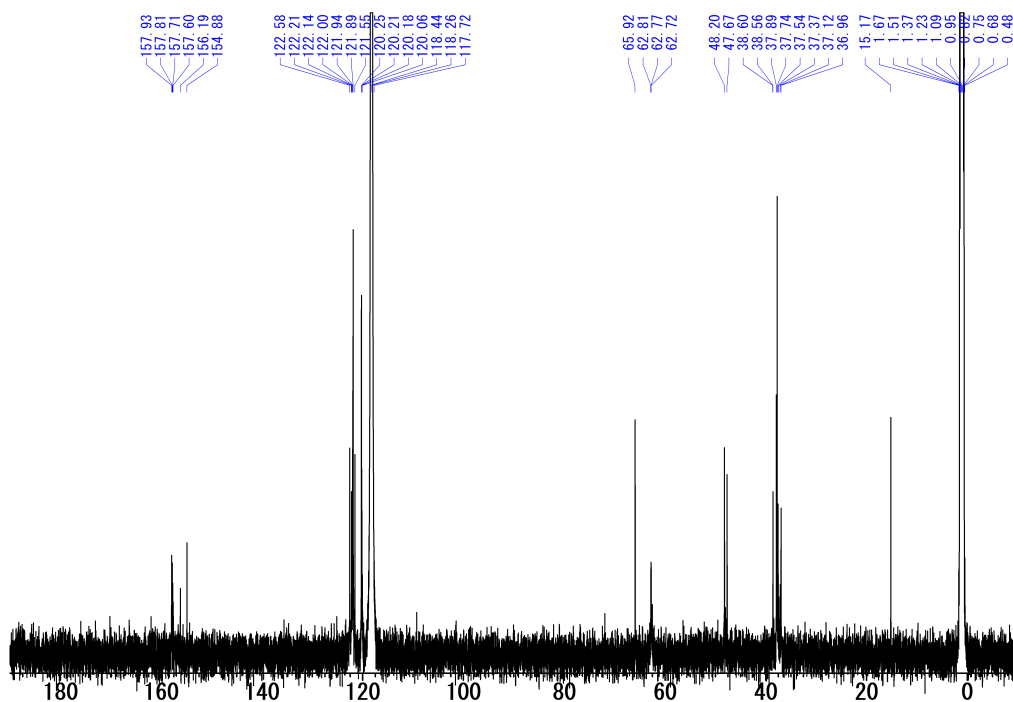

**Fig. S22**  $^{13}\text{C}$  NMR spectrum of  $[\text{Pt}^{\text{Cl}_2}\text{Pt}^{\text{C}_2}](\text{PF}_6)_2$  ( $\text{CD}_3\text{CN}$ , 150 MHz, 253 K):

a mixture of the isomers:  $\delta$  157.9 (2-im), 157.8 (2-im), 157.7 (2-im), 157.6 (2-im), 156.2 (2-im), 154.9 (2-im), 122.6 (4,5-im), 122.2 (4,5-im), 121.99-121.89 (4,5-im), 121.5 (4,5-im), 120.6 (4,5-im), 120.21 (4,5-im), 120.17 (4,5-im), 62.8-62.5 (N- $\text{CH}_2$ -), 48.2 (N- $\text{CH}_2$ -), 47.7 (N- $\text{CH}_2$ -), 38.6 (N-Me), 37.9 (N-Me), 37.7 (N-Me), 37.5 (N-Me), 37.4 (N-Me), 37.1 (N-Me), 36.9 (N-Me).

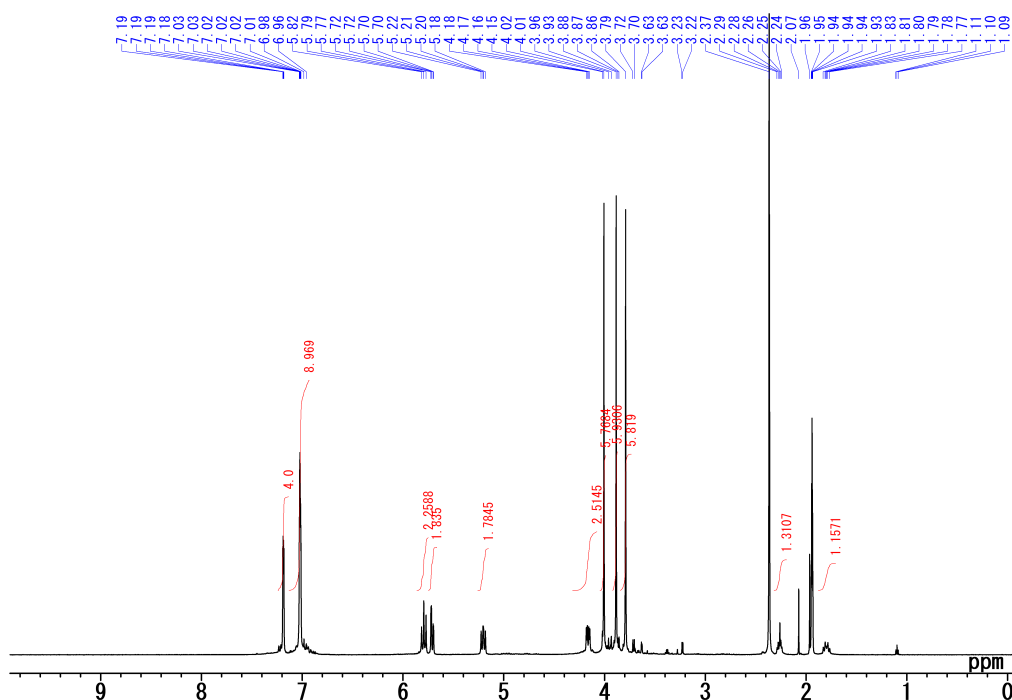

**Fig. S23**  $^1\text{H}$  NMR spectrum of  $[\text{Pt}^{\text{C1}}_2\text{Pt}^{\text{C3}}](\text{PF}_6)_2$  ( $\text{CD}_3\text{CN}$ , 600 MHz, 253 K):

$\delta$  7.19 (d,  $^3J_{\text{H-H}} = 1.9$  Hz, 2H, 4-im $^{\text{C1a}}$ ), 7.18 (d,  $^3J_{\text{H-H}} = 1.9$  Hz, 2H, 5-im $^{\text{C1a}}$ ), 7.03–7.01 (m, 8H, im $^{\text{C1b, C3}}$ ), 5.80 (d,  $^2J_{\text{H-H}} = 13.2$  Hz, 2H, N-CH $_2^{\text{C1}}$ ), 5.78 (d,  $^2J_{\text{H-H}} = 13.6$  Hz, 2H, N-CH $_2^{\text{C1}}$ ), 5.71 (d,  $^2J_{\text{H-H}} = 12.9$  Hz, 1H, N-CH $_2^{\text{C1}}$ ), 5.71 (d,  $^2J_{\text{H-H}} = 12.9$  Hz, 1H, N-CH $_2^{\text{C1}}$ ), 5.20 (dd, 2H,  $^2J_{\text{H-H}} = 14.3$  Hz,  $^3J_{\text{H-H}} = 11.1$  Hz, N-CH $_2^{\text{C3}}$ ), 4.16 (dd,  $^2J_{\text{H-H}} = 14.2$  Hz,  $^3J_{\text{H-H}} = 6.1$  Hz, 2H, N-CH $_2^{\text{C3}}$ ), 4.01 (s, 6H, N-Me $^{\text{C3}}$ ), 3.88 (s, 6H, N-Me $^{\text{C1a}}$ ), 3.79 (s, 6H, N-Me $^{\text{C1b}}$ ), 2.26 (ddd,  $^2J_{\text{H-H}} = 16.0$  Hz,  $^3J_{\text{H-H}} = 6.6$  Hz,  $^3J_{\text{H-H}} = 6.0$  Hz, 2H, N-CH $_2^{\text{C3}}$ ), 1H, -CH $_2^{\text{C3}}$ ), 1.80 (ddd,  $^2J_{\text{H-H}} = 16.3$  Hz,  $^3J_{\text{H-H}} = 10.9$  Hz,  $^3J_{\text{H-H}} = 10.9$  Hz, 1H, -CH $_2^{\text{C3}}$ ).



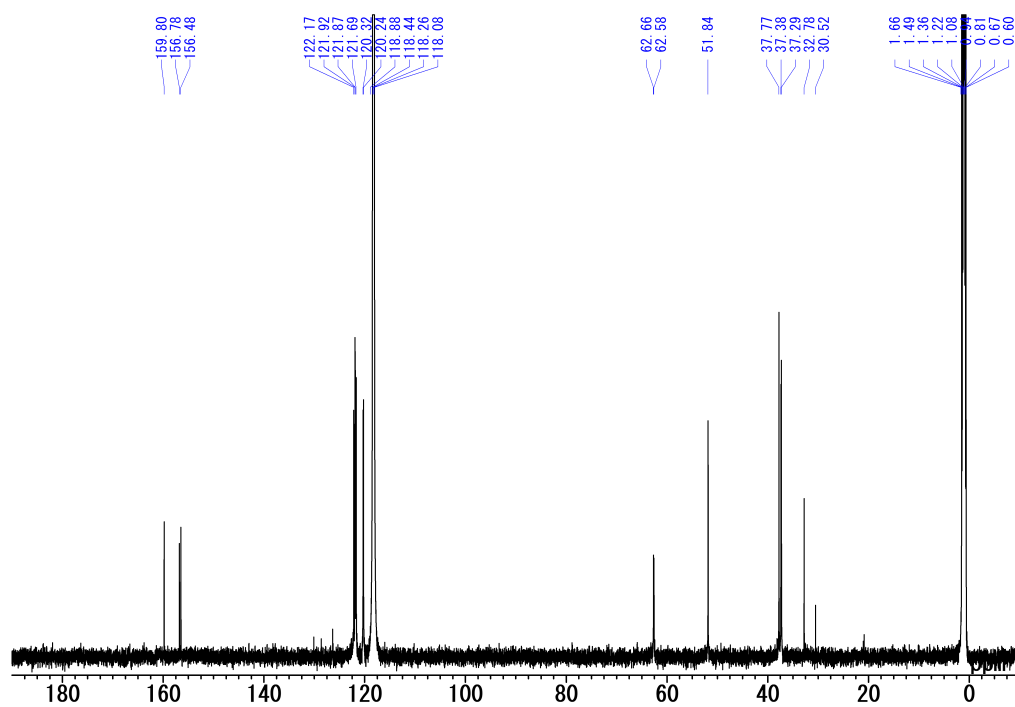

**Fig. S24**  $^{13}\text{C}$  NMR spectrum of  $[\text{Pt}^{\text{C1}}\text{Pt}^{\text{C3}}](\text{PF}_6)_2$  ( $\text{CD}_3\text{CN}$ , 150 MHz, 253 K):

$\delta$  159.8 (2-im $^{\text{C3}}$ ), 156.8 (2-im $^{\text{C1a,b}}$ ), 156.5 (2-im $^{\text{C1a,b}}$ ), 122.2 (s, 4,5-im $^{\text{C3}}$ ), 121.92 (s, 4,5-im $^{\text{C1b,C3}}$ ), 121.86 (s, 4,5-im $^{\text{C1b,C3}}$ ), 121.7 (s, 4,5-im $^{\text{C1b,C3}}$ ), 120.3 (s, 4,5-im $^{\text{C1a}}$ ), 120.2 (s, 4,5-im $^{\text{C1a}}$ ), 62.7 (s, N-CH $_2^{\text{C1a,b}}$ ), 62.6 (s, N-CH $_2^{\text{C1a,b}}$ ), 51.8 (s, N-CH $_2^{\text{C3}}$ ), 37.8 (s, N-Me $^{\text{C3}}$ ), 37.4 (s, N-Me $^{\text{C1a}}$ ), 37.3 (s, N-Me $^{\text{C1b}}$ ), 32.8 (s, -CH $_2^{\text{C3}}$ ).

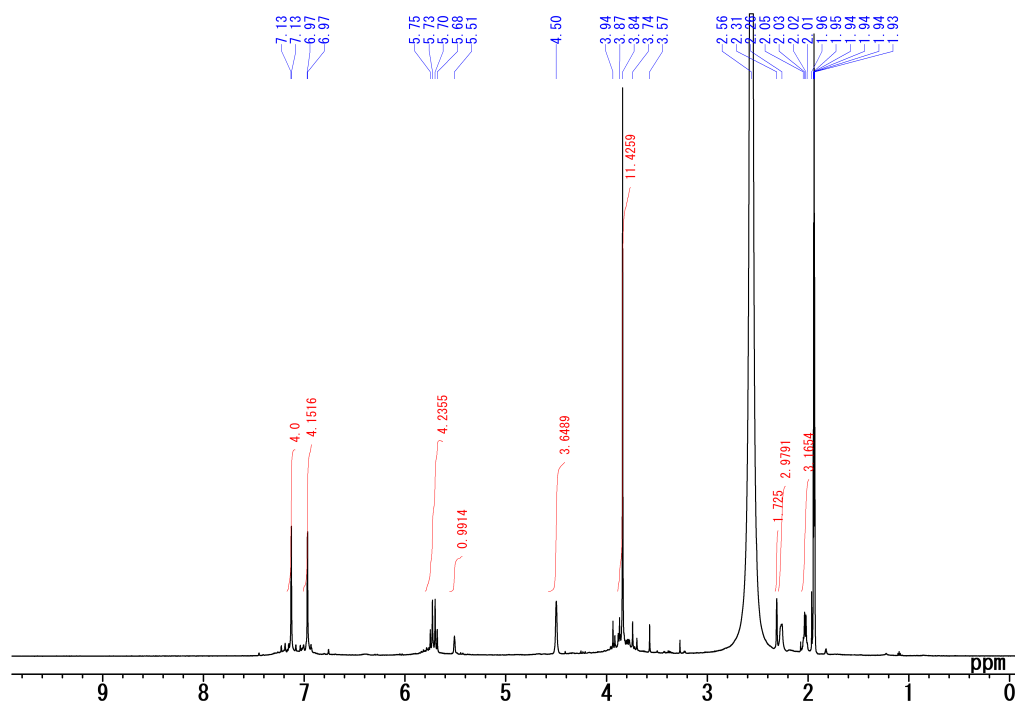

**Fig. S25**  $^1\text{H}$  NMR spectrum of  $[\text{Pt}^{\text{Cl}_2}\text{Rh}^{\text{cod}}](\text{PF}_6)$  ( $\text{CD}_3\text{CN}$ , 600 MHz, 253 K):

$\delta$  7.13 (d,  $^3J_{\text{H-H}} = 1.9$  Hz, 4H, 4-im), 6.97 (d,  $^3J_{\text{H-H}} = 1.9$  Hz, 4H, 5-im), 5.74 (d,  $^2J_{\text{H-H}} = 12.7$  Hz, 2H, N- $\text{CH}_2$ ), 5.69 (d,  $^2J_{\text{H-H}} = 12.7$  Hz, 2H, N- $\text{CH}_2$ ), 4.50 (br, 4H, cod-CH), 3.84 (s, 12H, N-Me), 2.26 (br, 4H, cod- $\text{CH}_2$ ), 2.03 (d, 4H,  $^2J_{\text{H-H}} = 8.0$  Hz, cod- $\text{CH}_2$ ).

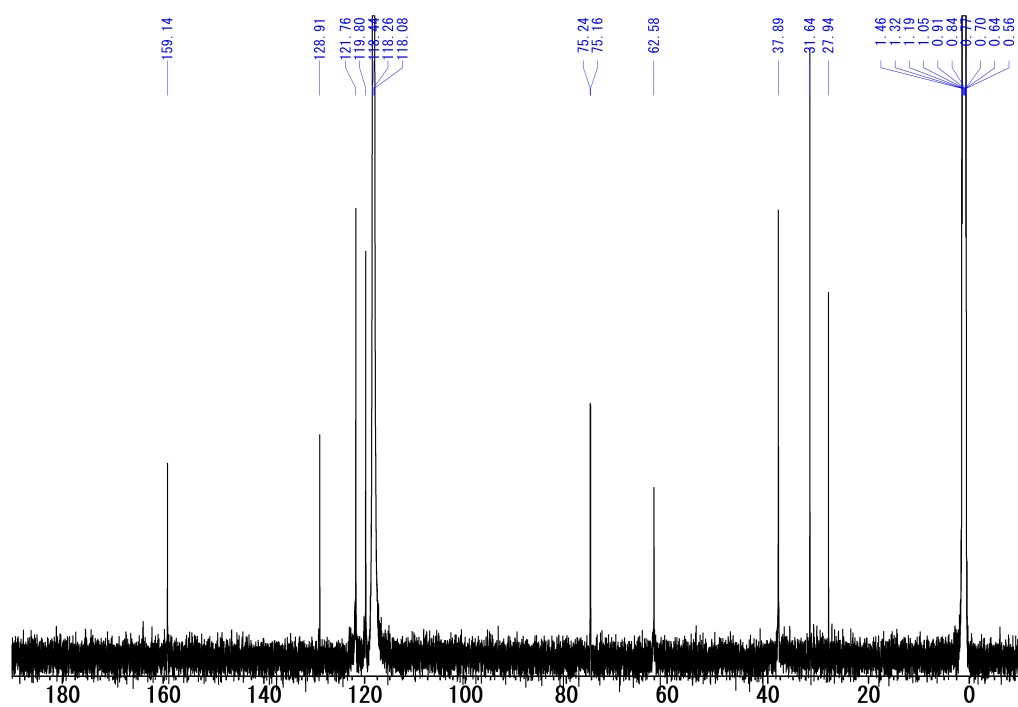

**Fig. S26**  $^{13}\text{C}$  NMR spectrum of  $[\text{Pt}^{\text{C12}}\text{Rh}^{\text{cod}}](\text{PF}_6)$  ( $\text{CD}_3\text{CN}$ , 150 MHz, 253 K):

$\delta$  159.1 (2-im), 121.8 (s, 5-im), 119.8 (s, 4-im), 75.2 (d,  $^1J_{\text{C-Rh}} = 11.2$  Hz, cod-CH), 62.6 (s, N-CH<sub>2</sub>), 37.9 (s, N-Me), 31.6 (s, cod-CH<sub>2</sub>).

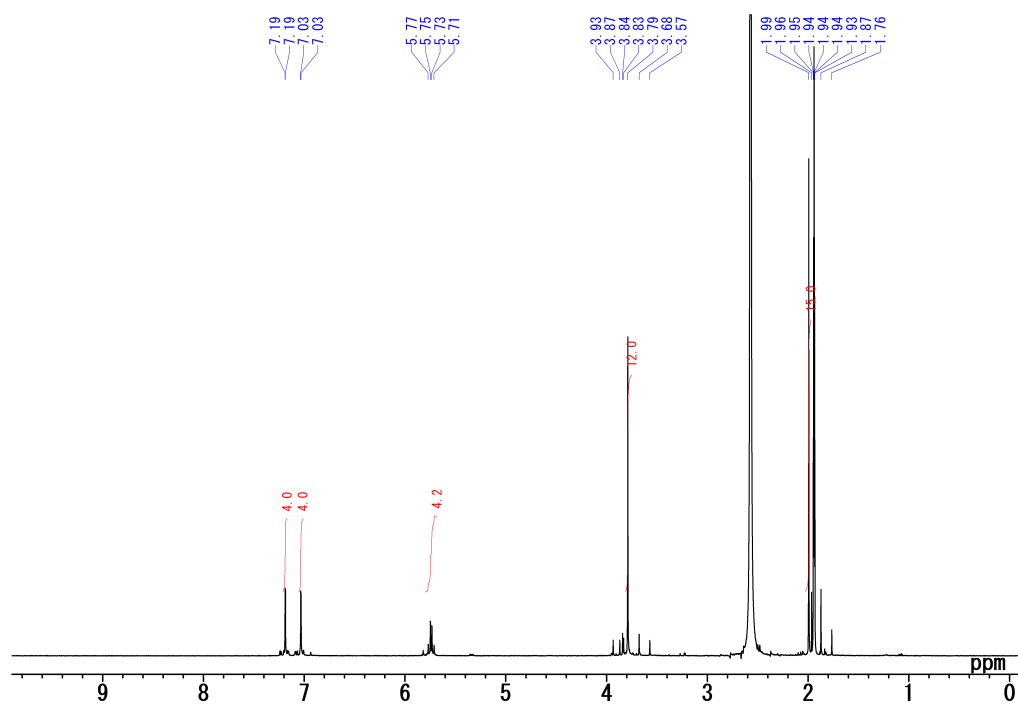

**Fig. S27**  $^1\text{H}$  NMR spectrum of  $[\text{Pt}^{\text{C12}}\text{Rh}^{\text{Cp}^*}](\text{PF}_6)_2$  ( $\text{CD}_3\text{CN}$ , 600 MHz, 253 K):

$\delta$  7.19 (d,  $^3J_{\text{H-H}} = 1.9$  Hz, 4H, 4-im), 7.03 (d,  $^3J_{\text{H-H}} = 1.9$  Hz, 4H, 5-im), 5.76 (d,  $^2J_{\text{H-H}} = 12.9$  Hz, 2H, N- $\text{CH}_2$ ), 5.72 (d,  $^2J_{\text{H-H}} = 12.9$  Hz, 2H, N- $\text{CH}_2$ ), 3.79 (s, 12H, N-Me), 1.99 (s, 15H, Cp\*-Me).

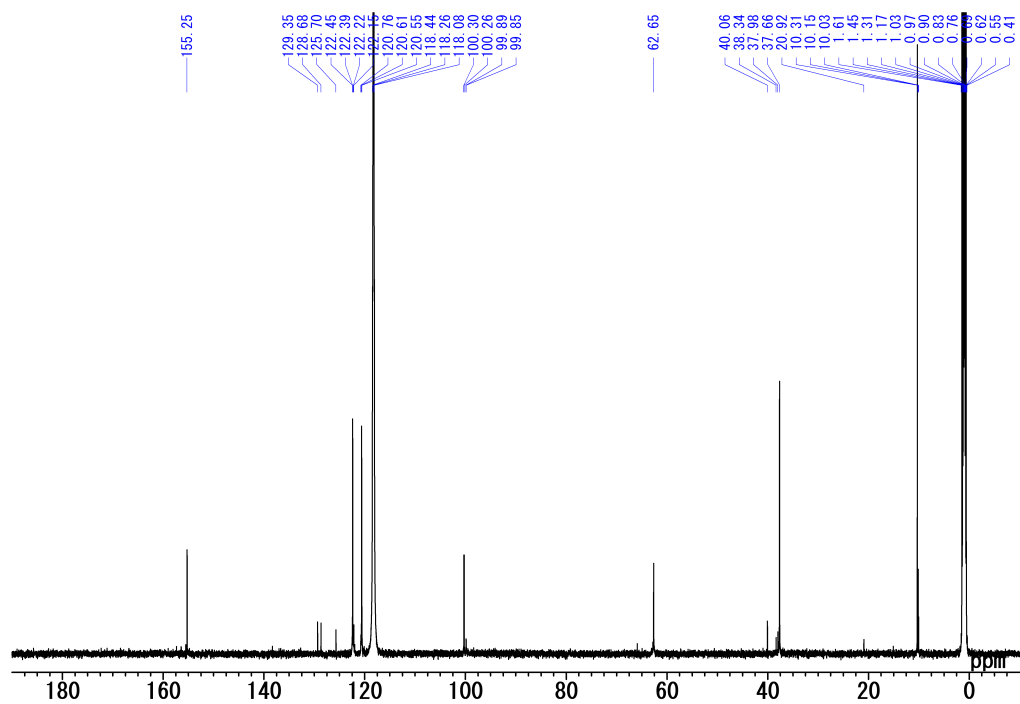

**Fig. S28**  $^{13}\text{C}$  NMR spectrum of  $[\text{Pt}^{\text{C1}}_2\text{Rh}^{\text{Cp}^*}](\text{PF}_6)_2$  ( $\text{CD}_3\text{CN}$ , 150 MHz, 253 K):

$\delta$  155.3 (2-im), 122.4 (s, 5-im), 120.6 (s, 4-im), 100.3 (d,  $^1J_{\text{C-Rh}} = 7.2$  Hz Cp\*-ring), 62.6 (s, N-CH<sub>2</sub>), 37.7 (s, N-Me), 10.3 (s, Cp\*-Me).

## 7. Electrospray ionisation mass spectrometry

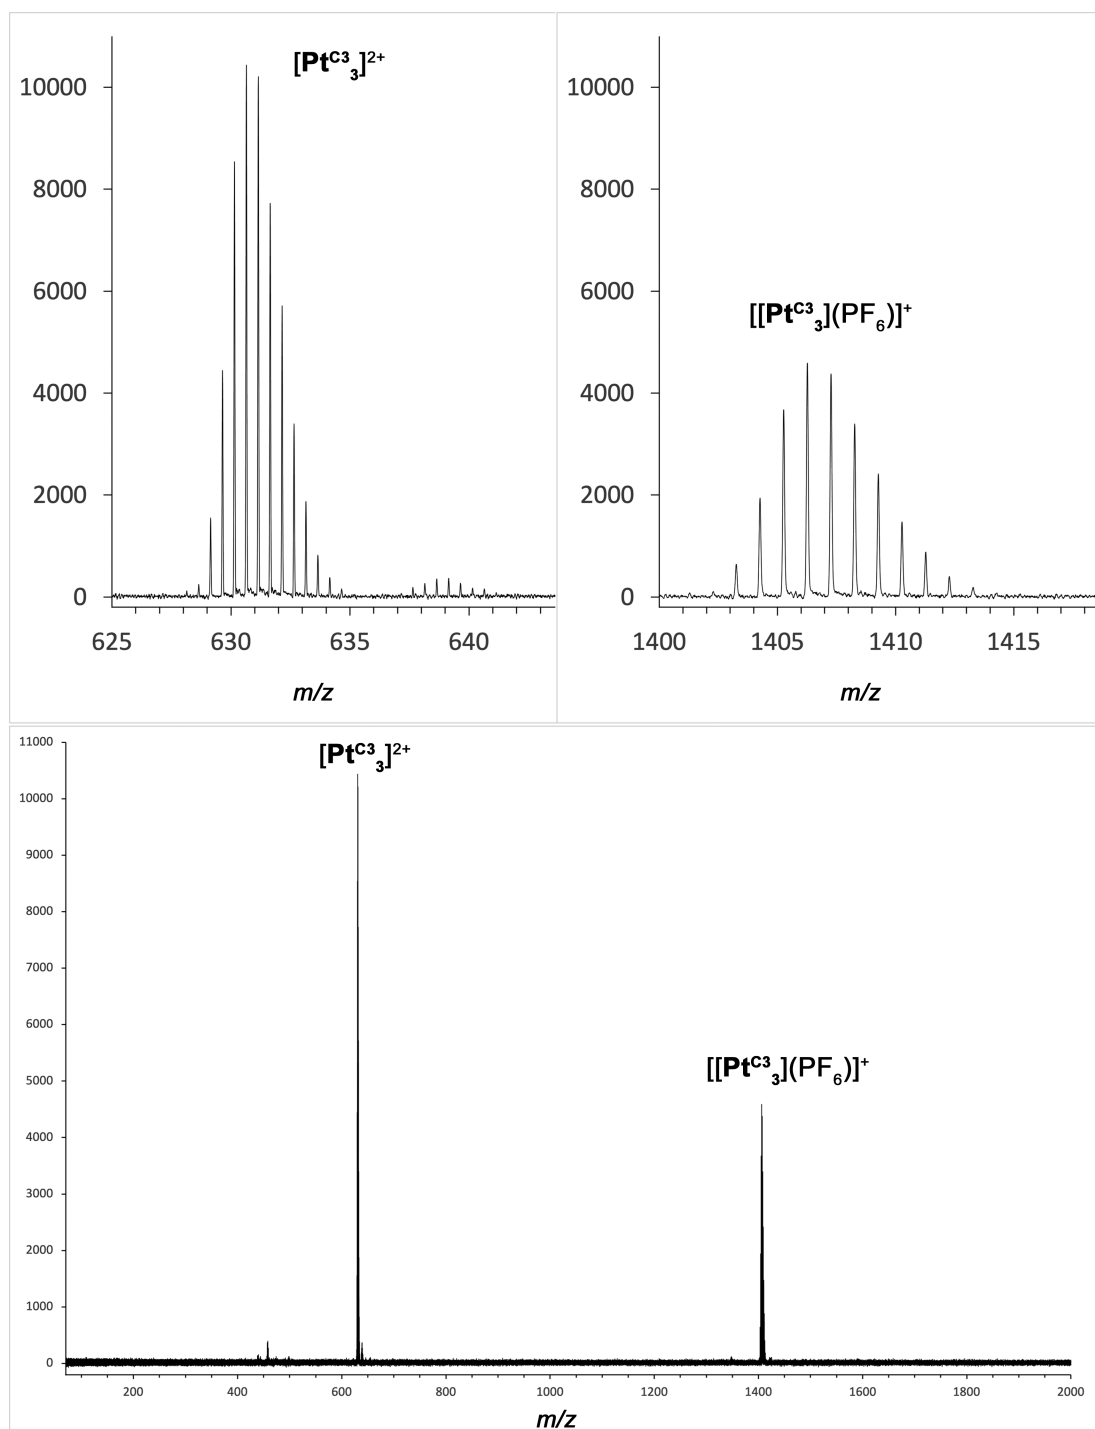

Fig. S29 ESI-mass spectrum of  $[\text{Pt}^{\text{C}3}]_3(\text{PF}_6)_2$  in  $\text{CH}_3\text{CN}$ .

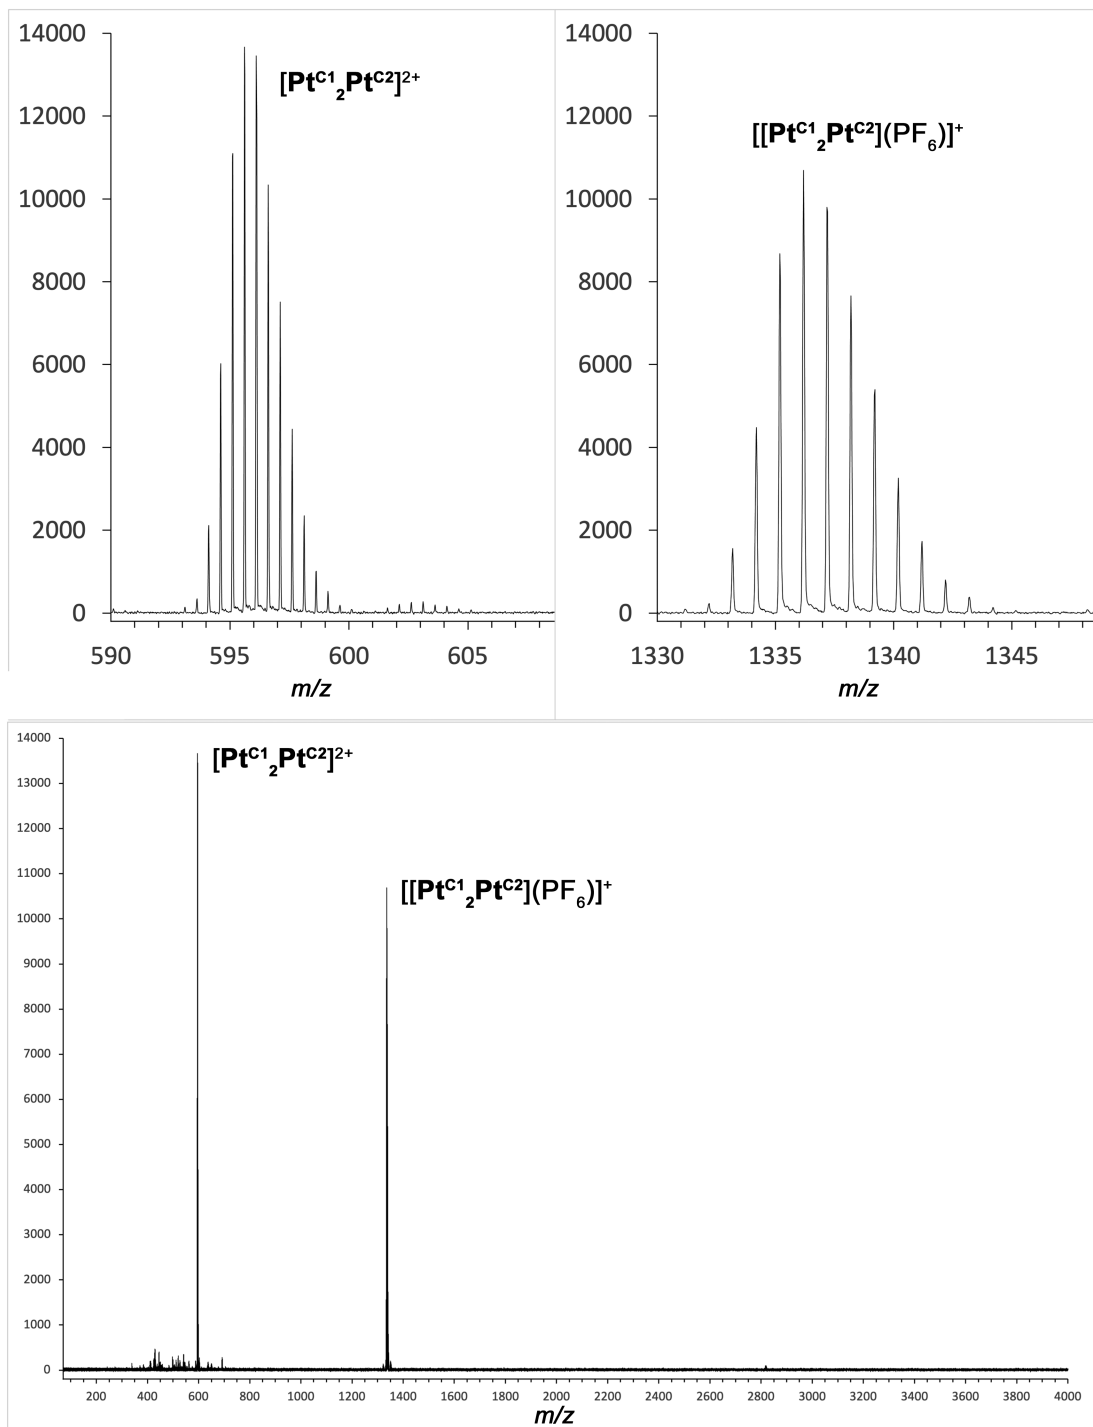

Fig. S30 ESI-mass spectrum of  $[\text{Pt}^{\text{C1}}\text{Pt}^{\text{C2}}](\text{PF}_6)_2$  in  $\text{CH}_3\text{CN}$ .

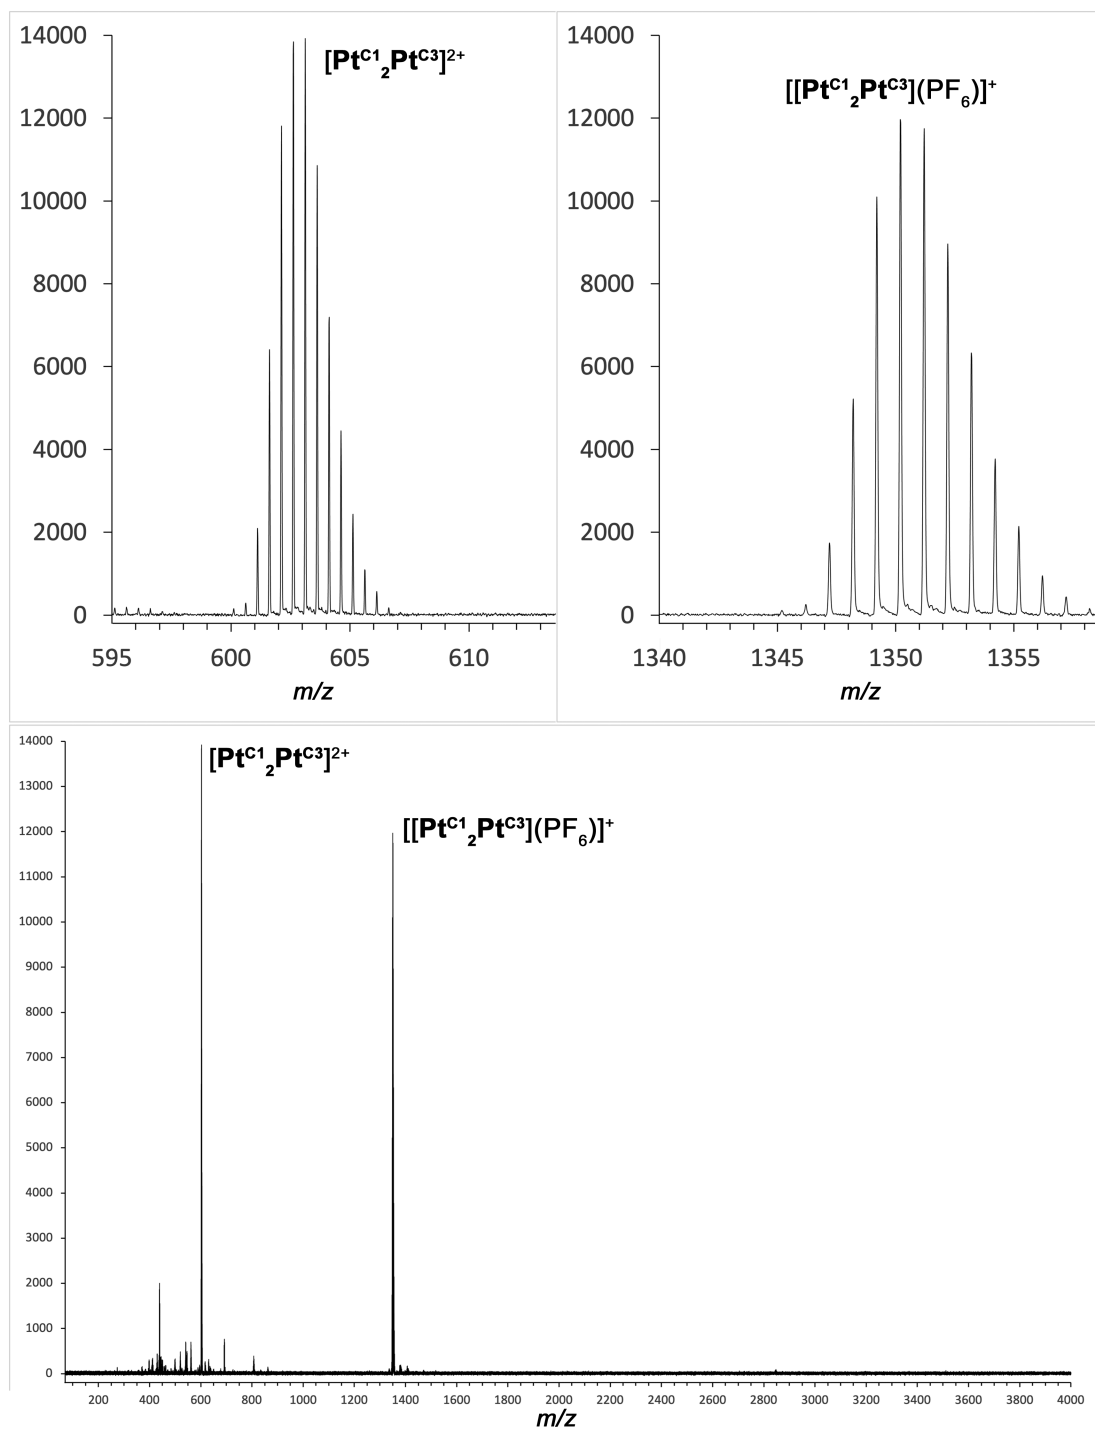

Fig. S31 ESI-mass spectrum of  $[\text{Pt}^{\text{C}1}_2\text{Pt}^{\text{C}3}](\text{PF}_6)_2$  in  $\text{CH}_3\text{CN}$ .



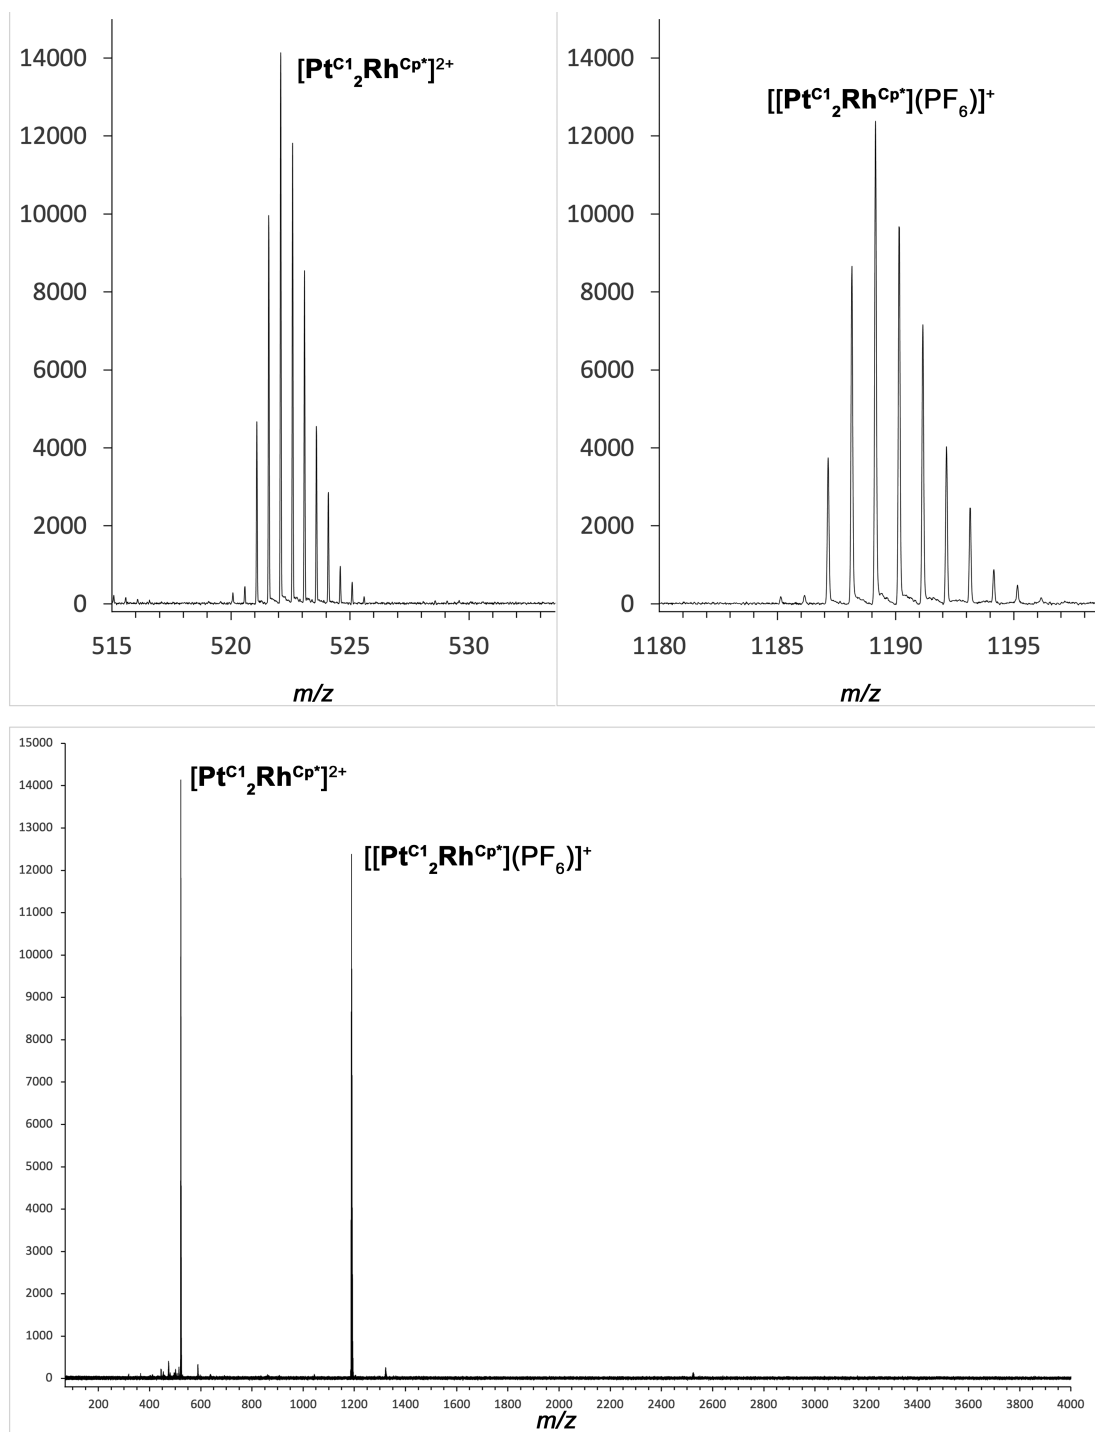

**Fig. S32** ESI-mass spectrum of  $[\text{Pt}^{\text{C1}}_2\text{Rh}^{\text{Cp}^*}](\text{PF}_6)_2$  in  $\text{CH}_3\text{CN}$ .

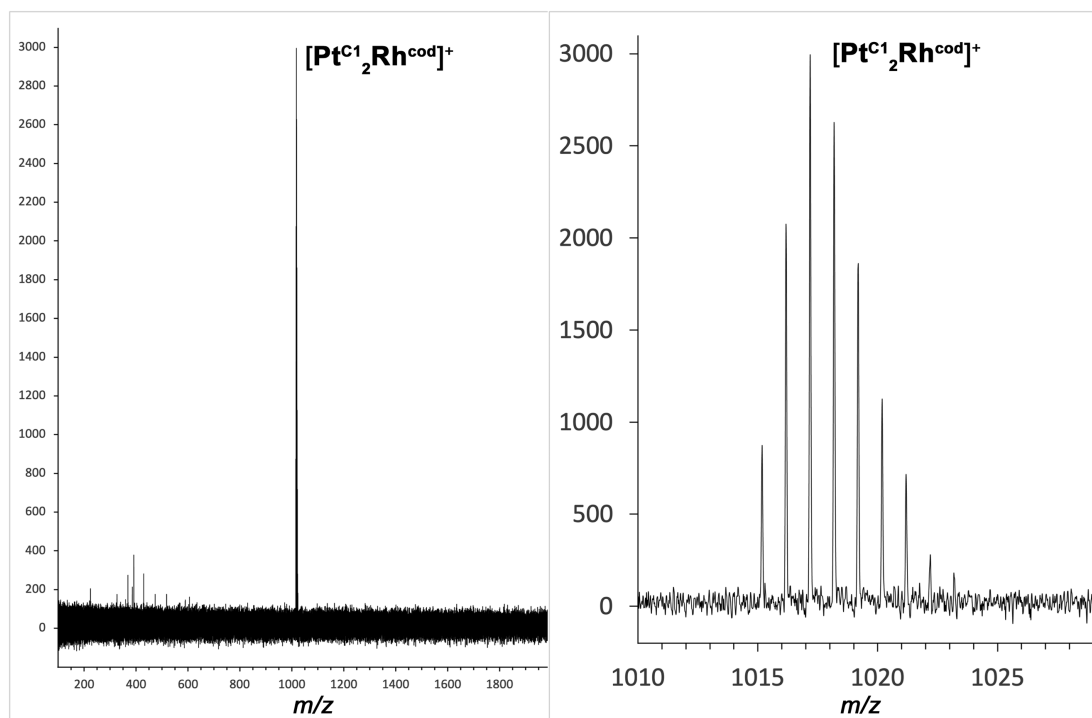

**Fig. S33** ESI-mass spectrum of  $[\text{Pt}^{\text{C}1}_2\text{Rh}^{\text{cod}}](\text{PF}_6)$  in  $\text{CH}_3\text{CN}$ .

## 8. Reference

1. A. L. Spek, *Acta Cryst.*, 2015, **C71**, 9–18.
